# 1 **Membrane phosphoinositides stabilize GPCR-arrestin complexes and offer temporal** 2 **control of complex assembly and dynamics**

3  
4 John Janetzko<sup>1</sup>, Ryoji Kise<sup>2</sup>, Benjamin Barsi-Ryne<sup>3,4</sup>, Dirk H. Siepe<sup>1,5,6</sup>, Franziska M.  
5 Heydenreich<sup>1</sup>, Matthieu Masureel<sup>1,7</sup>, Kouki Kawakami<sup>2</sup>, K. Christopher Garcia<sup>1,5,6</sup>, Mark von  
6 Zastrow<sup>3,4</sup>, Asuka Inoue<sup>2\*</sup>, Brian K. Kobilka<sup>1,8\*</sup>

7  
8 Affiliations:

9  
10 <sup>1</sup>Department of Molecular and Cellular Physiology, Stanford University School of Medicine,  
11 Stanford, CA, USA.

12 <sup>2</sup>Graduate School of Pharmaceutical Sciences, Tohoku University, 6-3, Aoba, Aramaki, Aoba-ku,  
13 Sendai, Miyagi, 980-8578 Japan.

14 <sup>3</sup>Department of Cellular and Molecular Pharmacology, University of California, San Francisco,  
15 School of Medicine, San Francisco, CA, USA.

16 <sup>4</sup>Department of Psychiatry, University of California, San Francisco, School of Medicine, San  
17 Francisco, CA, USA.

18 <sup>5</sup>Department of Structural Biology, Stanford University School of Medicine, Stanford, CA, USA

19 <sup>6</sup>Howard Hughes Medical Institute, Stanford University School of Medicine, Stanford, CA, USA.

20 <sup>7</sup>Present address: Department of Structural Biology, Genentech Inc., South San Francisco, CA  
21 94080, USA

22 <sup>8</sup>Lead contact

23 \*Correspondence: [iaska@tohoku.ac.jp](mailto:iaska@tohoku.ac.jp) (A.I.), [kobilka@stanford.edu](mailto:kobilka@stanford.edu) (B.K.K)

## 24 25 **Summary:**

26  
27 Arrestins recognize activated and phosphorylated G protein-coupled receptors (GPCRs) and are  
28 responsible for promoting acute desensitization of receptors as well as their endocytosis. As  
29 phosphatidylinositols have been shown to bind to components of the endocytic machinery,  
30 including arrestins, we examined the role of phosphoinositide (PIP) binding in GPCR-arrestin  
31 complexes. Using a PIP-binding-deficient mutant of arrestin we find that GPCRs stratify into two  
32 groups based on whether arrestin-PIP-interactions are required for arrestin recruitment to  
33 activated receptors. This requirement for arrestin-PIP-interactions depends on receptor  
34 phosphorylation, with receptors having more limited phosphorylation requiring arrestin-PIP-  
35 binding capacity. In vitro, this arrestin lipid binding functions to stabilize receptor-arrestin  
36 complexes and is crucial for promoting a core-engaged state of the complex. In the absence of a  
37 bound GPCR, PIP<sub>2</sub>, but not endosome resident PI(3)P, promotes conformational changes in  
38 arrestin that parallel activation, including movement of the finger and gate loops, but without  
39 release of the arrestin C-terminus. These results suggest a model for arrestin recruitment that  
40 depends on three components that each function to potentiate the conformation of arrestin: the  
41 GPCR core, phosphorylated GPCR C-terminus and membrane phosphoinositides. Integration of  
42 a phosphoinositide-dependence into arrestin-GPCR complex assembly provides a mechanism  
43 for release of arrestin from GPCRs with insufficient phosphorylation, allowing for their rapid  
44 recycling, while explaining how GPCRs that form stable complexes with arrestin can remain  
45 associated yet switch from desensitized to allowing G protein coupling in endosomes.

## 46 47 **Introduction:**

48 In order to achieve robust signaling, G protein-coupled receptors (GPCRs) are tightly regulated  
49 not just in their activation, but also in their deactivation. GPCR deactivation is a complex multi-  
50 step process often divided into an acute and a prolonged phase (Rajagopal and Shenoy, 2018).  
51 In addition to promoting G protein engagement, agonist stimulation leads to the recruitment of

52 GPCR kinases (GRKs), which phosphorylate the receptor and trigger recruitment of arrestins  
53 (Komolov and Benovic, 2018). Arrestin serves to first block further G protein engagement,  
54 resulting in an acute phase of desensitization, but also to mediate the trafficking of activated  
55 receptors to clathrin-coated structures (CCSs) and their internalization. Once internalized,  
56 receptors can experience markedly different fates, with some being rapidly recycled to the plasma  
57 membrane, while others are retained in intracellular compartments, or directed to lysosomes and  
58 degraded (Hanyaloglu and von Zastrow, 2008). In recent years, the discovery that GPCRs can  
59 signal from intracellular compartments (Irannejad et al., 2013) has led to a re-framing of GPCR  
60 signaling to include not only temporal regulation, but also differences that result from spatially  
61 distinct receptor populations (Irannejad et al., 2015; Lobingier and von Zastrow, 2019).

62  
63 There are four human arrestins; arrestins 1 and 4 are dedicated to the visual system, and arrestins  
64 2 and 3, also known as  $\beta$ -arrestin 1 ( $\beta$ arr1) and  $\beta$ -arrestin 2 ( $\beta$ arr2), respectively are ubiquitously  
65 expressed throughout the other tissues of the body. Remarkably, these two  $\beta$ -arrestins are  
66 responsible for recognition and desensitization of hundreds of GPCRs. Though most GPCRs  
67 recruit arrestin, the nature and duration of this interaction can differ between receptors, and  
68 historically GPCRs have been classified as either a “class A” receptor, which interacts transiently  
69 with arrestin, or a “class B” receptor which interacts more stably with arrestin, leading to in co-  
70 trafficking of arrestin to endosomes (Oakley et al., 2001; Oakley et al., 2000). Moreover, whether  
71 a GPCR interacted transiently or stably with arrestin appeared to correlate with rates of re-  
72 sensitization, with class A receptors re-sensitizing more rapidly than class B receptors (Oakley et  
73 al., 1999). Mechanistically, stable association of arrestin to “class B” GPCRs is correlated with the  
74 presence of particular phosphorylation site clusters (Oakley et al., 2001); however, it has  
75 remained unclear what event precipitates the dissociation of  $\beta$ -arrestins from “class A” receptors  
76 to allow their dephosphorylation and recycling.

77  
78 Early structural studies into GPCR-arrestin complexes suggested that arrestin could bind to a  
79 GPCR either through only the phosphorylated C-terminus (called tail-engaged), or through both  
80 the phosphorylated C-terminus and the transmembrane core of the GPCR (called core-engaged)  
81 (Shukla et al., 2014). Though unclear what might determine the equilibrium between these states,  
82 a tail-engaged state would maintain an accessible GPCR core, possibly allowing it to engage G  
83 proteins while bound to arrestin. These so-called “megaplex” assemblies (Nguyen et al., 2019;  
84 Thomsen et al., 2016) offered an explanation for sustained cAMP signaling produced by  
85 endosomal populations of V2R and PTH1R (Feinstein et al., 2013; Ferrandon et al., 2009), both  
86 of which stably associate with  $\beta$ -arrestins.

87  
88 At a molecular level, the prevailing model for arrestin activation (and thus recruitment to an active  
89 and phosphorylated GPCR) involves displacement of the auto-inhibitory C-terminus of arrestin by  
90 the GPCR phosphorylated C-terminus (or in some cases an intracellular loop). Once the arrestin  
91 C-terminus has been displaced, a number of structural rearrangements allow for arrestin to  
92 engage the GPCR (Sente et al., 2018), including insertion of the arrestin finger loop into a cavity  
93 formed by the cytoplasmic ends of transmembrane segments. Recently this model, which  
94 suggests a 1:1 interaction, has been challenged by the finding that some “class A” receptors  
95 recruit super-stoichiometric quantities of arrestin to the plasma membrane, and can lead to  
96 arrestin clustering in CCSs without an associated GPCR (Eichel et al., 2018). This study  
97 suggested that arrestin, after dissociation from a GPCR, can maintain an association with the  
98 plasma membrane by binding to PIP2 (Eichel et al., 2018), though based on the established  
99 mechanism for arrestin activation it was unclear how this would be possible, or how arrestin could  
100 promote MAPK signaling from CCSs after GPCR dissociation (Eichel et al., 2016).

101

102 Components of the endocytic machinery such as AP2 (Kadlecova et al., 2017), and  $\beta$ -arrestins  
103 (Gaidarov et al., 1999) have been shown to bind to phosphoinositides. These signaling lipids  
104 serve critical functions defining the identity of lipid compartments and acting as coincidence  
105 markers for protein-protein recognition and trafficking to occur only in the appropriate subcellular  
106 context (De Matteis and Godi, 2004; Di Paolo and De Camilli, 2006). While several studies have  
107 investigated the interactions of soluble inositol phosphates with both visual and non-visual  
108 arrestins (Chen et al., 2017; Chen et al., 2021; Milano et al., 2006; Zhuang et al., 2010), only one  
109 has explored the role of membrane phosphoinositides (Gaidarov et al., 1999). Importantly, this  
110 work suggested that plasma membrane PIPs, such as PIP2 and PIP3, may function to stabilize  
111 GPCR- $\beta$ -arrestin complexes as they traffic to CCSs.

112  
113 Recent structural studies showing PIP2 bound at the interface between the neurotensin type I  
114 receptor (NTSR1) and  $\beta$ arr1 (Huang et al., 2020) prompted us to ask the question: “what role do  
115 PIPs serve in mediating GPCR- $\beta$ -arrestin complex assembly?” Here we show that GPCRs which  
116 only transiently engage  $\beta$ -arrestin require phosphoinositide binding for  $\beta$ -arrestin recruitment.  
117 Further, by using NTSR1 as a model system we find that specific phosphorylation sites are linked  
118 to this phosphoinositide binding-dependence for arrestin recruitment. Using in vitro biochemical  
119 and biophysical assays, we demonstrate that phosphoinositide binding contributes to the stability  
120 of a GPCR- $\beta$ -arrestin complex, and in particular promotes a core-engaged state. We also find  
121 that phosphoinositides alone are able to promote a partially activated state of arrestin, thereby  
122 offering an explanation for how arrestin is able to persist at the plasma membrane once  
123 dissociated from a GPCR. Together, these results offer an explanation for how receptors that  
124 transiently associate with  $\beta$ -arrestin are able to recruit (and dissociate)  $\beta$ -arrestin in a  
125 spatiotemporally resolved manner, and strongly coupled receptors are able to maintain a stable  
126 association with arrestin in subcellular compartments yet regain the ability for further G protein  
127 engagement from subcellular structures.

128

## 129 **Results and Discussion:**

130

### 131 *Arrestin PIP-binding is important for desensitization of endogenous $\beta$ 2AR*

132

133 The PIP-binding-deficient mutant of  $\beta$ arr2 (K233Q/R237Q/K251Q,  $\beta$ arr2 numbering, henceforth  
134 3Q, also used to denote mutation of homologous residues in  $\beta$ arr1) was previously found to be  
135 impaired for internalization of  $\beta$ 2AR (Gaidarov et al., 1999), with  $\beta$ arr2 (3Q) failing to traffic to  
136 CCSs, though still being recruited from the cytoplasm to the plasma membrane, albeit to a lesser  
137 extent than wild-type (WT) (Eichel et al., 2018). As such, we wondered how this behavior effects  
138  $\beta$ 2AR signaling and specifically whether  $\beta$ arr2 (3Q) is capable of desensitizing  $\beta$ 2AR at the plasma  
139 membrane. Using a recently developed cAMP sensor (Tewson et al., 2016), we monitored cAMP  
140 levels in live HEK293 cells lacking both  $\beta$ -arrestins, and endogenously expressing the  $\beta$ 2AR  
141 (O'Hayre et al., 2017). In the absence of exogenously expressed  $\beta$ arr2 (transfection of mApple  
142 alone), isoproterenol (iso) stimulation led to a sustained cAMP response, while expression of  
143  $\beta$ arr2-mApple led to expected desensitization. However, expression of  $\beta$ arr2 (3Q)-mApple  
144 resulted in much less desensitization over 30 minutes (Figure S1A); furthermore, this difference  
145 was observed in two independent cell lines (Luttrell et al., 2018; O'Hayre et al., 2017). This  
146 suggests that the PIP-binding function of  $\beta$ -arrestins plays an important functional role, in not only  
147 internalization (Gaidarov et al., 1999), but also receptor desensitization, and does so under  
148 conditions of endogenous GPCR expression.

149

### 150 *GPCRs stratify into two groups in their dependence on PIP-binding for arrestin recruitment*

151

152 That  $\beta$ arr2 (3Q) is impaired for recruitment to  $\beta$ 2AR, but seemingly not for the chimeric receptor  
153  $\beta$ 2AR-V2C, which bears the C-terminus of the vasopressin V2 receptor (Eichel et al., 2018),  
154 suggested that GPCRs may have different dependencies on  $\beta$ -arrestin PIP-binding capability for  
155 recruitment. To investigate this more generally, we used a cell-based NanoBiT assay (Dixon et  
156 al., 2016), wherein a plasma membrane marker (CAAX) is fused to the large subunit of a modified  
157 Nanoluc luciferase (LgBiT) and recruitment of either  $\beta$ arr1 or  $\beta$ arr2, which bear an N-terminal  
158 complementary small subunit of Nanoluc (SmBiT), can be monitored by luminescence changes  
159 (Figure 1A). We selected a set of 22 representative GPCRs (Supplementary Data Table 1), co-  
160 expressed the sensors with each receptor of interest in HEK293 cells, and compared the  
161 recruitment of WT  $\beta$ -arrestin to that of the corresponding 3Q  $\beta$ -arrestin mutant upon agonist  
162 stimulation (Figure 1B, top, Supplementary Data Table 1). We determined time-averaged end-  
163 point luminescence fold-changes from 10-15 minutes post-agonist stimulation and fit the resulting  
164 data to generate concentration response curves and extract a recruitment amplitude for each  
165 receptor-arrestin pair (see methods) (Figure 1B, bottom, Supplementary Data Figure 1A-B). We  
166 then compared the recruitment of WT and 3Q arrestin using a metric that represented the relative  
167 sensitivity of the receptor to loss of arrestin-PIP binding capacity, we termed the loss of function  
168 (LOF) index (see methods). Receptors with a low LOF value recruit WT and 3Q  $\beta$ -arrestins to the  
169 plasma membrane similarly, and are deemed PIP-independent, while receptors with a high LOF  
170 value show greatly diminished recruitment of 3Q  $\beta$ -arrestin and are deemed PIP-dependent  
171 (Figure 1C). Both WT and 3Q forms of  $\beta$ arr1 and  $\beta$ arr2 express similarly (Figure S1B,  
172 Supplementary Data Figure 2).

173  
174 To better understand this distinction, we performed k means clustering of plasma membrane  
175 recruitment data for all receptor- $\beta$ -arrestin pairs (Supplementary Data Figures 1 and 6, n=55  
176 receptor- $\beta$ -arrestin pairs), which suggested that the data is best divided into two clusters (see  
177 methods, clusters marked by dotted ellipses in Figure 1C). We found only a weak correlation  
178 (Pearson correlation = -0.51; -0.4 when TACR1 and B2R are excluded) between the amplitude of  
179 WT arrestin recruitment and the degree of LOF observed (Figure S1C), suggesting that  
180 differences in LOF were not simply due to lower levels of WT recruitment. Cluster 1 was defined  
181 by receptors that exhibited a high degree of LOF (center LOF = 0.73) and included GPCRs  
182 previously classified as “class A” (Oakley et al., 2000):  $\beta$ 2AR,  $\mu$ OR, ETAR, D1R,  $\alpha$ 1BR. Cluster  
183 2, defined by receptors with a low degree of LOF (center LOF = 0.06), included GPCRs classified  
184 as “class B” (Oakley et al., 2000): AT1R, NTSR1, V2R, TRHR, and TACR1. Based on the results  
185 from Eichel et al. (Eichel et al., 2018), we tested two chimeric receptors,  $\beta$ 2AR-V2C and  $\mu$ OR-  
186 V2C, both of which showed reduced reliance on  $\beta$ -arrestin PIP binding capability for plasma  
187 membrane recruitment compared to the respective parent receptor. The V1AR, which was  
188 previously shown to undergo labile phosphorylation and rapid recycling (Innamorati et al., 1998a;  
189 Innamorati et al., 1998b) clusters with the class A receptors in cluster 1, while the V1BR, bearing  
190 a closer similarity in its proximal C-terminus to V2R clusters with class B receptors in cluster 2,  
191 even though it has been found to only associate transiently with arrestin (Perkovska et al., 2018).  
192 In addition,  $\beta$ 1AR, S1PR1, and  $\delta$ OR, all three of which have been suggested to either recycle  
193 rapidly or interact transiently with arrestin (Martinez-Morales et al., 2018; Nakagawa and Asahi,  
194 2013; Trapaidze et al., 2000), were assigned to cluster 1. Other receptors known to co-traffic with  
195 arrestin to endosomes, including PAR2 (DeFea et al., 2000; Dery et al., 1999; Oakley et al., 2001),  
196 B2R (Khoury et al., 2014), and PTH1R (Feinstein et al., 2011) were also classified into cluster 2.  
197 Two receptors, OXTR and HTR2C displayed unexpected behavior where  $\beta$ arr1 recruitment was  
198 dramatically more sensitive to loss of PIP-binding than  $\beta$ arr2, resulting in these GPCR- $\beta$ -arrestin  
199 pairs being divided between the two clusters. OXTR was previously classified as a “class B”  
200 receptor (Oakley et al., 2001); however, these studies only examined  $\beta$ arr2 recruitment. In the  
201 case of the HTR2C, it was reported that PIP2-depletion did not affect association of  $\beta$ arr2 (Toth



202 et al., 2012), which can be consistent with our findings since even though HTR2C was clustered  
203 with PIP-dependent receptors the observed LOF of 0.4 for  $\beta$ arr2 sits between the two centers.  
204 Together, these data show that recruitment of  $\beta$ -arrestins is dependent on the PIP-binding  
205 capacity of arrestin for some GPCRs, but not others, and that this distinction is consistent with  
206 the previous class A/B categorization.

207  
208 While our use of a plasma membrane bystander avoids modifying the receptor of interest, we  
209 wanted to confirm that plasma membrane recruitment is indeed a reliable proxy for arrestin  
210 recruitment to a GPCR of interest, especially given that some receptors such as  $\beta$ 2AR,  $\beta$ 1AR,  
211 and  $\mu$ OR have been reported to recruit super-stoichiometric quantities of arrestin, relative to  
212 receptor (Eichel et al., 2018). For this, we used a direct NanoBiT assay in which the SmBiT  
213 component is fused to the C-terminus of each GPCR of interest, and the N-terminus of arrestin is  
214 modified with the LgBiT fragment (Figure S1D, left). We found that recruitment measured by this  
215 direct complementation largely paralleled recruitment measured using the plasma membrane  
216 bystander, with minor exceptions (Supplementary Data Figure 4). Further, directly comparing LOF  
217 as measured by the plasma membrane bystander to that of the direct complementation showed  
218 a strong positive correlation (Pearson correlation = 0.88), suggesting that  $\beta$ -arrestin recruitment  
219 measured through the plasma membrane bystander was indeed a faithful metric (Figure S1D,  
220 right). The most extreme outlier, the serotonin 2C receptor (HTR2C), showed  $\beta$ arr2 recruitment  
221 is PIP-binding independent as measured by the direct recruitment assay, but partially PIP-binding-  
222 dependent when measured using the plasma membrane bystander. Interestingly, this receptor  
223 was found to recruit arrestin even when PIP2 was acutely depleted (Toth et al., 2012). Additional  
224 receptors found to exhibit reduced PIP-binding sensitivity in the direct recruitment assay, for  $\beta$ arr2,  
225 included  $\alpha$ 1BAR and  $\beta$ 1AR, both of which exhibit some level of Gq coupling (Inoue et al., 2019).  
226 We speculate for cluster 1 receptors, such as HTR2C, which are primarily Gq-coupled, that their  
227 dependence on PIP-binding for arrestin recruitment to the plasma membrane may be amplified  
228 due to local PIP2-depletion upon stimulation.

229  
230 We also asked whether 3Q arrestins were differentially co-trafficked to endosomes. We used the  
231 FYVE domain of endofin as an endosome bystander (Endo) which we fused to LgBiT to monitored  
232 recruitment of arrestin bearing an N-terminal SmBiT (Figure S1E), as was done for plasma  
233 membrane recruitment. Since both  $\beta$ arr1 and  $\beta$ arr2 displayed largely similar behavior in our  
234 plasma membrane recruitment assay, we focused on  $\beta$ arr1 for these experiments; however, we  
235 also examined  $\beta$ arr2 recruitment for selected receptors (Supplementary Data Figure 5B). All  
236 receptors known to mediate co-trafficking of arrestin to endosomes did so (Figure S1E,  
237 Supplementary data figure 5A-B), including OXTR, which showed measurable endosomal  
238 association of  $\beta$ arr2, compared to weak and barely measurable  $\beta$ arr1 endosome recruitment  
239 (Supplementary data figure 5C). In contrast, HTR2C showed more robust recruitment of  $\beta$ arr1  
240 than  $\beta$ arr2 (Supplementary Data Figure 5D). As expected, other cluster 1 receptors whose ability  
241 to co-traffic  $\beta$ -arrestins to endosomes had not yet been described displayed little signal for  
242 endosomal translocation, while other cluster 2 receptors showed robust signal for recruitment of  
243 both WT and 3Q  $\beta$ -arrestins.

244  
245 Though end-point recruitment of  $\beta$ arr1 to NTSR1, and other cluster 2 GPCRs was largely  
246 unaffected by loss of the PIP-binding site, prior NTSR1 experiments had found that loss of PIP  
247 binding slowed the kinetics of  $\beta$ -arrestin recruitment (Huang et al., 2020), suggesting PIP2 may  
248 play a role in the complexes formed with cluster 2 receptors, even when end-point recruitment is  
249 unchanged. We fit the rate of  $\beta$ -arrestin translocation to the plasma membrane in response to  
250 stimulation for all GPCRs in cluster 2 using our CAAX bystander NanoBiT assay (Figure 1B, top).

251 As was seen for NTSR1, other cluster 2 GPCRs showed a slower association for 3Q than WT  
252 (Figure S2A). Though the magnitude of the effect varied across receptors (Figure S2B), these  
253 results clearly show that even recruitment to cluster 2 GPCRs is impacted by loss of PIP-binding  
254 in  $\beta$ -arrestins.

255  
256 Together, these results provide several major findings: the first being that, generally, GPCRs that  
257 co-traffic with  $\beta$ -arrestins to endosomes do not require the PIP-binding capacity of  $\beta$ -arrestins for  
258 plasma membrane recruitment and are henceforth referred to as PIP-independent GPCRs.  
259 Secondly, though PIP-independent GPCRs retained the ability to recruit  $\beta$ -arrestins, the kinetics  
260 of recruitment were generally impaired by loss of PIP binding, suggesting that PIP-mediated  
261 interactions still contributed to recruitment for these receptors. Finally, while most GPCRs showed  
262 similar behavior between  $\beta$ arr1 and  $\beta$ arr2, there were exceptions for recruitment and PIP-binding-  
263 dependence, which supports the notion that there are receptor specific recruitment properties that  
264 remain poorly understood.

### 265 266 *Phosphorylation sites dictate dependence on PIP-binding*

267  
268 As the distinction between class A and class B receptors was previously attributed to the presence  
269 of suitably positioned clusters of phosphosites in the receptor C-terminus (Oakley et al., 2001),  
270 we reasoned that there must be a degree of phosphorylation required to overcome the  
271 dependence on arrestin-PIP binding for recruitment to class A receptors. We chose the NTSR1  
272 as a model receptor since WT NTSR1 stably associated with arrestins and the major  
273 phosphorylation cluster responsible for this phenotype were previously established for the rat  
274 ortholog (Oakley et al., 2001). Using human NTSR1, we designed a set of phosphorylation-  
275 deficient mutants, including both the C-terminus and the third intracellular loop (ICL3) (Figure 2A).  
276 ICL3 was found to be subject phosphorylation and appeared to make contacts to arrestin in a  
277 recent structure of NTSR1- $\beta$ arr1 (Huang et al., 2020), though the role of ICL3 phosphorylation in  
278 arrestin recruitment had not previously been explored. NTSR1 contains four S/T residues in ICL3,  
279 three of which are clustered together, and 9 S/T residues in its C-terminus, 6 of which are divided  
280 into two clusters. We compared the PIP-dependence of phosphorylation mutants (Figure 2A) for  
281 recruitment of  $\beta$ arr1 to the plasma membrane, using the previously described NanoBiT assay  
282 (Figure 1A). We first measured surface expression of the NTSR1 constructs and observed similar  
283 expression levels (Figure S3A), with the exception of ICL3-4A, which showed somewhat reduced  
284 expression. In addition, we confirmed that at the level of expression used the NanoBiT response  
285 was saturated making differences in amplitude unlikely to arise from any slight variations in  
286 expression between constructs (Figure S3B-C). Though WT NTSR1 was classified as a PIP-  
287 independent receptor, NTSR1 phosphorylation mutants could either be classified into both cluster  
288 1 or cluster 2 (Figure 2A, Supplementary Data Figure 6), suggesting that particular  
289 phosphorylation mutants rendered arrestin recruitment to NTSR1 PIP-dependent. Removal of the  
290 two C-terminal phosphorylation site clusters (NTSR1-6A, NTSR1-10A) resulted in a dramatic  
291 reduction in arrestin recruitment (Supplementary Data Figure 6A), with remaining arrestin  
292 recruitment being largely PIP-dependent. Removal of the ICL3 phosphorylation sites did not affect  
293 PIP-dependence (NTSR1-ICL3-4A), and neither did removal of the proximal phosphorylation  
294 cluster (NTSR1-AVAA), nor did removal of any one residue in the distal cluster (NTSR1-TLSA,  
295 NTSR1-ALSS, NTSR1-TLAS). However, removal of the distal phosphorylation cluster (NTSR1-  
296 ALAA) led to a dramatic reduction in recruitment, and an increase in PIP-dependence, consistent  
297 with findings that the distal cluster in the rat ortholog is necessary for stable arrestin association  
298 (Oakley et al., 2001). NTSR1-5A, bearing a single C-terminal phosphorylation site in the distal  
299 cluster, showed PIP sensitivity comparable to NTSR1-ALAA, while NTSR1-4A with two distal  
300 cluster phosphorylation sites showing much less PIP-dependence, suggesting that two

301 phosphorylation sites are sufficient to overcome the need for PIP binding. Similarly, NTSR1-  
302 TLAA, which differs from NTSR1-5A only in the addition of the proximal cluster of phosphosites  
303 exhibits sensitivity between the NTSR1-5A and NTSR1-4A constructs, suggesting that a  
304 phosphorylation site from the proximal cluster may offer a partial rescue for the absence of one  
305 in the distal cluster.

306  
307 As the plasma membrane bystander recruitment assay suggested that two phosphorylation sites  
308 were necessary to overcome the PIP-dependence on arrestin recruitment, we wondered whether  
309 this behavior coincided with an ability to co-traffic arrestin to endosomes. We monitored  
310 translocation of arrestin to endosomes using the endosome bystander NanoBiT assay (Figure  
311 S1E). As expected, NTSR1-ALAA (Oakley et al., 2001) as well as NTSR1-6A and NTSR1-10A  
312 failed to recruit arrestin to endosomes (Figure 2B, Supplementary Data Figure 6B). A single C-  
313 terminal phosphorylation site (NTSR1-5A) was insufficient to promote arrestin traffic to  
314 endosomes; however, two phosphorylation sites in the distal cluster (NTSR1-4A) were sufficient  
315 to promote endosomal translocation. There was a further increase in recruitment when the  
316 proximal sites were returned (NTSR1-TLSA), suggesting an additional contribution from this  
317 region strengthens the interaction between NTSR1 and arrestin. Further support for a contribution  
318 from the proximal cluster stems from the difference between NTSR1-5A and NTSR1-TLAA, which  
319 differ in whether or not the proximal phosphorylation cluster is present and show a marked  
320 difference in both targeting of arrestin to endosomes, as well as PIP-dependence (Figure 2B).  
321 Within the distal cluster, any two phosphorylation sites were sufficient, and having the third  
322 present appeared to offer no additional benefit (NTSR1-AVAA compared to NTSR1-ALSS,  
323 NTSR1-TLAS and NTSR1-TLSA) (Figure 2B).

324  
325 Given that two phosphorylation sites in the distal cluster were sufficient for both PIP-insensitivity  
326 for plasma membrane recruitment, and co-trafficking of arrestin to endosomes, we asked whether  
327 two phosphorylation sites were also sufficient for receptor internalization. We measured  
328 internalization of the NTSR1 constructs in  $\Delta$   $\beta$ arr1/2 HEK293 cells where either WT or 3Q  $\beta$ arr1  
329 was reintroduced. WT NTSR1 was robustly internalized by both WT and 3Q  $\beta$ arr1. In contrast,  
330 NTSR1-5A showed a significant difference in internalization between WT and 3Q  $\beta$ arr1, while  
331 NTSR1-4A showed no difference in internalization between WT and 3Q  $\beta$ arr1. The trend between  
332 NTSR1-5A and NTSR1-4A parallels that seen for  $\beta$ 2AR and  $\beta$ 2AR-V2C (Figure 2C), supporting  
333 that two phosphorylation sites are sufficient for robust internalization that is PIP-independent. In  
334 addition, the internalization observed for NTSR1-5A by WT  $\beta$ arr1 suggests that the lack of  
335 endosome recruitment observed for this construct (Figure 2B) is due to weakened GPCR- $\beta$ arr  
336 interaction and not simply a lack of internalization for this receptor.

337  
338 Together, these data show that two suitably positioned phosphorylation sites are sufficient to  
339 render  $\beta$ -arrestin recruitment PIP-independent and allow for robust arrestin-dependent  
340 internalization as well as support co-trafficking of arrestin to endosomes. Furthermore, they show  
341 that NTSR1, a receptor that recruits  $\beta$ -arrestin in a PIP-independent manner, can become PIP-  
342 dependent by changes in receptor phosphorylation.

343  
344 *PIP2 binding affects complex stability and tail-core equilibrium in vitro*

345  
346 As PIP-binding was previously suggested to stabilize the interaction between a GPCR and  
347 arrestin (Gaidarov et al., 1999), based on experiments in cells, we wanted to explicitly test this *in*  
348 *vitro*. Using NTSR1 as our model receptor, where PIP-binding was not strictly necessary for  
349 recruitment in cells, we compared the ability of GRK5 phosphorylated NTSR1 to form a complex  
350 with  $\beta$ arr1 (WT or 3Q mutant) in the presence of a soluble PIP2 derivative, diC8-PI(4,5)P2

351 (henceforth PIP2), by size-exclusion chromatography (Figure 3A-B) (Huang et al., 2020). While  
352 complexing with full-length WT  $\beta$ arr1 led to about 25% complex formation, use of 3Q  $\beta$ arr1  
353 resulted in <5% complex formation (Figure 3C). Use of a C-terminally truncated  $\beta$ arr1 (1-382) led  
354 to a more than 2-fold enhancement in complex formation, which was only slightly reduced with  
355 the corresponding 3Q arrestin. Using the LOF metric developed to evaluate the impact of PIP-  
356 binding on arrestin recruitment in cells, we found that full length arrestin showed a greater degree  
357 of LOF than C-terminally truncated arrestin, suggesting that removal of the arrestin C-tail is largely  
358 able to overcome the impairment in complexing that results from the 3Q mutation (Figure S4A).  
359 Since arrestin activation is understood to proceed via initial release of its auto-inhibitory C-tail  
360 (Sente et al., 2018; Shukla et al., 2013), we wanted to rule-out the possibility that 3Q  $\beta$ arr1  
361 complexing efficiency is simply reduced due to a lack of arrestin C-tail release. We designed a  
362 Förster Resonance Energy Transfer (FRET) sensor to report on arrestin C-tail release (Figure  
363 S4B): using a cysteine-free  $\beta$ arr1 construct, we introduced two new cysteine residues at positions  
364 12 and 387 –  $\beta$ arr1 (12-387) – to allow for selective labeling of these positions with a suitable dye  
365 pair. Given that the expected change in distance between the bound and unbound C-tail was ~40  
366 Å (Chen et al., 2017; Kim et al., 2012; Zhuo et al., 2014), we used an AlexaFluor 488/Atto 647N  
367 FRET pair, which offers a relatively short Förster radius ( $R_0$  ~50 Å). We found that GRK5-  
368 phosphorylated NTSR1 robustly displaced the C-tail of both WT and 3Q  $\beta$ arr1 (12-387),  
369 comparably to that of a saturating concentration of phosphopeptide corresponding to the  
370 phosphorylated C-terminus of the vasopressin 2 receptor (henceforth V2Rpp) known to displace  
371 the arrestin C-tail (Shukla et al., 2013), even at concentrations 10x lower (Figure S4C). These  
372 data show that not only does *in vitro* phosphorylated NTSR1 fully displace the arrestin C-tail, but  
373 with higher efficacy than an equimolar concentration of phosphopeptide (even in the presence of  
374 unphosphorylated NTSR1), and this is independent of the PIP-binding ability of arrestin.

375  
376 We reasoned that the reduced complexing efficiency of 3Q  $\beta$ arr1 may be due to differences in the  
377 proportion of core-engaged complex being formed. To test this hypothesis, we used an  
378 environmentally sensitive bimane fluorophore (BIM) site-specifically installed at L68 (L68BIM) on  
379 the arrestin finger loop, a region that upon formation of a core-engaged complex with an active  
380 GPCR becomes buried within the receptor TM core. Such a sensor had previously been used to  
381 report on core-engagement for rhodopsin/arrestin-1 (Sommer et al., 2005, 2006), where upon  
382 core-engagement a blue-shift and an increase in fluorescence emission occurs, owing to the  
383 bimane probe moving into a lower polarity environment within the receptor TM core.

384  
385 While addition of V2Rpp to  $\beta$ arr1 L68BIM leads to C-tail release and a ~50% increase in bimane  
386 fluorescence as seen previously (Latorraca et al., 2020), we speculated that the addition of  
387 receptor may further increase this signal. We compared the fluorescence changes of  $\beta$ arr1  
388 L68bim (WT or 3Q) upon addition of NTSR1 that was either dephosphorylated or phosphorylated  
389 by GRK5 (Figure 3E). In the absence of phosphorylation, there was no increase in fluorescence;  
390 however, phosphorylated NTSR1 led to a 2-fold enhancement in fluorescence intensity. The  
391 addition of V2Rpp at a saturating concentration to the unphosphorylated NTSR1 did not result in  
392 a significant increase over phosphopeptide alone, consistent with the behavior observed for C-  
393 tail release (Figure S4C). Furthermore, this effect was only seen for WT  $\beta$ arr1 L68BIM, and not  
394 the 3Q mutant, which showed an increase in fluorescence when V2Rpp was added, but no further  
395 enhancement with both unphosphorylated and GRK5 phosphorylated NTSR1.

396  
397 We reason that if the complex exists as a dynamic equilibrium between three states (Figure 3F):  
398 dissociated, tail-bound and core-engaged. Then if PIP-binding serves to stabilize the core-  
399 engaged state loss of lipid binding would bias the equilibrium towards a tail-engaged state, which  
400 should have a similar spectroscopic signature to V2Rpp alone. Taken together, these data



401 suggest a model of complex assembly where release of the arrestin C-terminus by the  
402 phosphorylated GPCR C-terminus is rapid, and reversible. The resulting tail-bound state is in  
403 equilibrium with a core-engaged state, where arrestin-lipid binding stabilized this state and  
404 thereby slowing dissociation. In the context of full length arrestin, destabilization of core-engaged  
405 state in the 3Q mutant leads to a reduction in complex stability, presumably due to arrestin C-tail-  
406 mediated dissociation from the tail-bound state. However, when the arrestin C-terminus is  
407 removed, the reduced core-engagement of the 3Q mutant does not impact complexing efficiency  
408 due to the increased stability of the tail-bound state (as seen in Figure 3C, S4A).

409

410 *PIP2, in the absence of a GPCR, triggers conformational changes in arrestin*

411

412 Some GPCRs, such as the  $\beta$ 1AR,  $\beta$ 2AR and D2R recruit arrestin to the plasma membrane in  
413 super-stoichiometric quantities, and without the need of a phosphorylated C-terminus, but this  
414 recruitment depends on the ability of arrestin to bind PIPs (Eichel et al., 2018)). Having shown  
415 that PIP-binding affects the dynamics of NTSR1- $\beta$ arr1 complexes in vitro, we wondered whether  
416 PIPs in the absence of an associated GPCR could also affect the conformation of  $\beta$ arr1. We  
417 compared the effect of PIP2 to the V2Rpp for promoting conformational changes in arrestin using  
418 FRET and fluorescence reporters on the finger loop, gate loop, and C-tail (Figure 4A).

419

420 Both the finger loop (Figure 4B, Figure S5A-B) and gate loop (Figure 4C, Figure S5C-D) showed  
421 saturable conformational changes upon addition of PIP2 which were smaller than those seen for  
422 V2Rpp. Further, the corresponding PIP-binding defective 3Q mutants did not show PIP2-induced  
423 conformational changes, though they responded to V2Rpp similarly to WT protein (Figure S5).  
424 These data suggest that binding of PIP2 to the arrestin C-lobe allosterically promotes  
425 conformational changes in key arrestin regions involved in GPCR recognition and activation. As  
426 the accepted mechanism for arrestin activation begins with release of its autoinhibitory C-tail  
427 (Sente et al., 2018), we wondered whether these conformational changes were the result of  
428 allosterically promoted C-tail release. Using our  $\beta$ arr1 C-tail FRET sensor (Figure S4B) we found  
429 that PIP2 indeed promoted a small movement of the arrestin C-terminus (Figure 4D), but only at  
430 concentrations higher than those needed to saturate the responses seen for either the finger or  
431 gate loop sensors (Figure 4B-C). As was the case for the other sensors, this FRET change in  
432 response to PIP2 is absent in the corresponding 3Q mutant (Figure S5E-F). This finding is  
433 consistent with recent DEER experiments that found little or no C-terminal displacement for  $\beta$ arr1  
434 with IP6 (Chen et al., 2021).

435

436 We reason that the conformational changes in the finger and gate loops observed together with  
437 the small FRET change in response to PIP2 could either be due to a change in the equilibrium of  
438 active-inactive  $\beta$ arr1, or a population of an intermediate state of arrestin bearing a change in  
439 position or orientation of the arrestin C-tail within the arrestin N-lobe.

440

441 *PIP2 increases the population of active arrestin*

442

443 While our fluorescence experiments support PIP2-promoted conformational changes consistent  
444 with arrestin activation, the lack of C-tail release raised questions of whether these conformational  
445 changes truly reflected an increase in the population of active arrestin, as would be detected by  
446 arrestin binding partners. While the active form of arrestin is understood to mediate signaling via  
447 interactions through a number of protein partners, including MAPK, ERK, SRC (Ranjan et al.,  
448 2017; Reiter et al., 2012), there has been speculation that the binding of a particular partner might  
449 be mediated by a distinct arrestin conformation. We reasoned that the most objective way to probe  
450 the global activation state of arrestin was through the use of an engineered Fab (Fab30), which

451 was raised to bind to the active (V2Rpp-bound) state of  $\beta$ arr1 with high-affinity (Shukla et al.,  
452 2013). Fab30 has found utility in a number of structural studies (Lee et al., 2020; Nguyen et al.,  
453 2019; Shukla et al., 2013; Shukla et al., 2014; Staus et al., 2020), functional studies (Cahill et al.,  
454 2017; Ghosh et al., 2019; Kumari et al., 2016; Latorraca et al., 2020; Thomsen et al., 2016) and  
455 more recently it has been adapted as a single-chain intrabody (IB30) for the detection of active  
456  $\beta$ arr1 in cells (Baidya et al., 2020a; Baidya et al., 2020b).

457  
458 We used Surface Plasmon Resonance (SPR) to measure binding of Fab30 to immobilized  $\beta$ arr1  
459 (Figure 5A). To confirm the immobilized arrestins behave as expected, we tested binding of  
460 V2Rpp and Fab30+V2Rpp (Figure 5B). Though selected for binding to the V2Rpp-bound state of  
461  $\beta$ arr1, Fab30 also bound to unliganded  $\beta$ arr1 weakly, and interestingly this binding was enhanced  
462 when Fab30 was injected together with PIP2 (Figure 5B). This suggested that PIP2 increased the  
463 proportion of arrestin that can be stabilized in the active by Fab30, consistent with our  
464 fluorescence experiments that supported PIP2 playing a role in arrestin activation. We then  
465 compared the effect of PIP2 to that of PG, and PI(3)P for WT arrestin, but also the PIP-binding  
466 deficient 3Q mutant, and the pre-activated (1-382) arrestin (Kim et al., 2013). At 1  $\mu$ M, Fab30  
467 alone showed  $10.2 \pm 0.9\%$  (of maximal) binding to WT  $\beta$ arr1, compared to  $56.8 \pm 2.0\%$  binding  
468 for the C-terminally truncated arrestin (Figure 5C). This suggests that Fab30 binding is favored  
469 by a conformation accessible to WT arrestin, but greatly enhanced by removal of the arrestin C-  
470 terminus. When Fab30 is injected together with a saturating concentration of PIP2 (40  $\mu$ M),  
471 binding to WT arrestin increased more than 3-fold, to  $33.9 \pm 1.8\%$ , compared to Fab30 alone. In  
472 contrast, PI(4,5)P2 had a smaller effect on the pre-activated (1-382) arrestin, but still increased  
473 binding from 56.8% to  $65.9 \pm 0.8\%$ . In the case of the 3Q mutant, PIP2 still enhanced binding of  
474 Fab30, but significantly less than for WT. PG and PI(3)P enhanced binding of Fab30 to WT  
475 arrestin, relative to unliganded, though the effect was small, and more specifically was  
476 significantly less than that seen with PI(4,5)P2. Further, in the case of 3Q arrestin, there was no  
477 difference between PG, PI(3)P and PI(4,5)P2, suggesting that while any anionic lipids may weakly  
478 increase Fab30 binding to arrestin, PI(4,5)P2 affected a specific increase in Fab30 binding. Both  
479 PG and PI(3)P did not enhance Fab30 binding to 1-382  $\beta$ arr1.

480  
481 Based on these data we propose that spontaneous activation of arrestin to an active-state capable  
482 of binding Fab30 is possibly but rare in the absence of arrestin inputs (Figure 5D). V2Rpp is able  
483 to dramatically shift the equilibrium towards the active-state by displacement of the arrestin C-  
484 terminus, and removal of the arrestin C-terminus alone is sufficient to greatly enhance the active-  
485 population, even in the absence of any arrestin ligand. Unlike V2Rpp, which displaces the arrestin  
486 C-terminus, PIP2 which is not able to displace the arrestin C-terminus is only able to partially  
487 stabilize the active-state of arrestin. Alternatively, PIP2 stabilizes a distinct intermediately-active  
488 arrestin capable of binding Fab30, although with a lower affinity.

## 489 490 **Conclusions:**

491  
492 Our results reveal new molecular details underpinning the regulation of arrestin recruitment to  
493 GPCRs, and how spatial and temporal control of GPCR- $\beta$ -arrestin complexes may occur within a  
494 cell.

495  
496 In particular, these findings offer a molecular basis for understanding the phenotypic classification  
497 of GPCRs as “class A” or “class B”. In our model (Figure 6), we refer to “class A” and “class B”  
498 GPCRs as “PIP-dependent” and “PIP-independent”, respectively. “PIP-dependent” GPCRs  
499 (Figure 6, left) require the coincident detection of membrane PIPs together with the activated and  
500 phosphorylated GPCR for arrestin recruitment. We speculate that this may be due to an

501 insufficiency in phosphorylation of these receptors, requiring either an allosteric priming of C-tail  
502 release by plasma membrane PIPs, such as PI(4,5)P<sub>2</sub>, or that both phosphate-mediated contacts  
503 and PIP-mediated contacts are required to act in concert to form a sufficiently long-lived complex  
504 for normal function. As some PIP-dependent GPCRs can recruit arrestin in a C-terminus-  
505 independent manner, this may suggest that release of the arrestin C-terminus may not be  
506 necessary for arrestin function in the context of these receptors. A further trait of these PIP-  
507 dependent GPCRs is that they exhibit, to a varying degree, the “catalytic activation” phenotype  
508 (Eichel et al., 2018) wherein arrestin, after recruitment to an active GPCR, loses association with  
509 the GPCR but remains at the plasma membrane and concentrates at CCSs. This can be  
510 explained by the increasing concentration gradient of PIP<sub>2</sub> leading into the CCS (Sun et al., 2007),  
511 together with our biophysical evidence that arrestin is not only able bind PIP<sub>2</sub>, but that PIP<sub>2</sub> is  
512 able to promote conformational transitions associated with activation. Once a GPCR cargo has  
513 been translocated into a CCS, clathrin-mediated endocytosis (CME) proceeds and PIP<sub>2</sub> levels  
514 drop. We believe that this may serve as the timing component for arrestin dissociation from these  
515 PIP-dependent GPCRs. Presumably, once arrestin has dissociated, the receptor is susceptible  
516 to dephosphorylation, and upon arrival at early endosomes is able to be sorted for rapid recycling  
517 (Krueger et al., 1997). In contrast, “PIP-independent receptors” (Figure 6, right panel) possess  
518 phosphorylation sites which alone are able to promote a stable association with arrestin, without  
519 the need for membrane PIPs. Since PIP-binding is not necessary to maintain the GPCR-arrestin  
520 association, arrestin is able to co-traffic with these receptors to endosomes.

521  
522 These data suggest that while PIP-mediated contacts are not necessary to maintain association,  
523 they likely affect the equilibrium of core vs. tail-engaged states of the complex. We speculate that  
524 this shift in equilibrium, particularly in the context of endosomes defined by PI(3)P, may explain  
525 how PIP-independent receptors, such as V2R and PTH1R are able to engage both  $\beta$ -arrestin and  
526 G proteins simultaneously in a so-called “megaplex” assembly (Nguyen et al., 2019; Thomsen et  
527 al., 2016).

528  
529 To-date four structures of GPCR- $\beta$ arr1 complexes have been described, all of which show arrestin  
530 in a core-engaged state (Huang et al., 2020; Lee et al., 2020; Staus et al., 2020; Yin et al., 2019),  
531 but only one had PIP<sub>2</sub> bound at the interface (Huang et al., 2020). Interestingly, this NTSR1- $\beta$ arr1  
532 complex with PIP<sub>2</sub> bound used the native NTSR1 C-terminus and did not use Fab30 to stabilize  
533 the complex. We speculate that Fab30 may play a particularly important role as previously it had  
534 been shown that Fab30 was essential for stabilizing the  $\beta$ 2AR-V2C- $\beta$ arr1 complex Fab30 (Shukla  
535 et al., 2014).

536  
537 Overall, our data offer a parsimonious explanation for several phenotypic behaviors observed for  
538 GPCR- $\beta$ -arrestin complexes and provide a biophysical framework to understand the interplay  
539 between phosphorylation-mediated and PIP-mediated contacts in complex assembly. A reliance  
540 on phosphoinositides for arrestin recruitment offers a robust solution for recruitment of arrestin to  
541 receptors with spatial control, and temporal precision. Given the interplay between PIP-dependent  
542 recruitment and phosphorylation, we believe that distinct signaling outcomes may not only be due  
543 to differences in phosphorylation alone (Latorraca et al., 2020), but rather that these differences  
544 may be further fine-tuned by membrane PIPs that are present in distinct subcellular locations,  
545 adding yet another layer of complexity to our understanding of GPCR signaling.

#### 546 547 **Acknowledgements:**

548  
549 We thank Betsy White (Stanford University) for technical laboratory assistance; Shoji Maeda  
550 (Stanford University) for providing purified Fab30 protein; Weijiao Huang (Stanford University) for

551 assistance with NTSR1 expression and purification; Daniel Hilger (Stanford University) for purified  
552 BirA enzyme; Yoon Seok Kim and Eamon Byrne (Stanford University) for assistance with FSEC  
553 experiments. We also thank Kayo Sato, Yuko Sugamura, Shigeko Nakano and Ayumi Inoue at  
554 Tohoku University for plasmid construction and cell-based GPCR assays. This work was  
555 supported in part by National Institutes of Health grants R01NS028471 (B.K.K.), R01 AI125320  
556 (K.C.G), R01DA010711 and R01DA012864 (M.vZ.). Additional support to both K.C.G and B.K.K.  
557 is provided by the Mathers Foundation. B.K.K. is a Chan-Zuckerberg Biohub Investigator. J.J. is  
558 a Damon Runyon Fellow supported by the Damon Runyon Cancer Research Foundation (DRG-  
559 2318-18). B.B.R. is a recipient of an American Heart Association Predoctoral Fellowship  
560 (19PRE34380570). F.M. H. is a recipient of a Marie Skłodowska-Curie Individual Fellowship from  
561 the European Union's Horizon 2020 research and innovation programme (grant agreements No.  
562 844622) and an American Heart Association postdoctoral fellowship (19POST34380839). M.M.  
563 was supported by an American Heart Association postdoctoral fellowship (17POST33410958).  
564 A.I. was funded by the PRIME 19gm5910013, the LEAP 20gm0010004 and the BINDS  
565 JP20am0101095 from the Japan Agency for Medical Research and Development (AMED);  
566 KAKENHI 17K08264 and 21H04791 from by the Japan Society for the Promotion of Science  
567 (JSPS); JST Moonshot Research and Development Program JPMJMS2023 from Japan Science  
568 and Technology Agency (JST); Daiichi Sankyo Foundation of Life Science; Takeda Science  
569 Foundation; Ono Medical Research Foundation (A.I.); The Uehara Memorial Foundation.

570

#### 571 **Author Contributions:**

572

573 J.J and A.I. conceived the project and designed experiments and analysis. J.J. expressed, purified  
574 and labeled proteins for biophysical measurements and performed in vitro experiments. R.K. and  
575 A.I. performed NanoBiT, flow-cytometry and western blot experiments. B.B-R. performed live-cell  
576 cAMP experiments overseen by M.vZ. J.J and D.H.S. performed SPR experiments, overseen by  
577 K.C.G. F.M.H. contributed to data analysis. M.M. and K.K. contributed to protein expression,  
578 purification and/or construct design. J.J. analyzed data with input from A.I., R.K., B.B-  
579 R.,D.H.S.,F.M.H., M.vZ. and B.K.K. J.J. and B.K.K. wrote the paper with input from all authors.

580

#### 581 **Declaration of Interests:**

582

583 B.K.K is a cofounder and consultant for conformetRx, Inc.

584

#### 585 **Figure titles and legends, tables with titles and legends:**

586

587 Figure 1. Arrestin phosphoinositide binding is required for recruitment to some GPCRs A) cartoon  
588 depicting NanoBiT assay for measuring arrestin plasma membrane recruitment upon agonist  
589 stimulation. Upon complementation SmBiT and LgBiT form a functional NanoLuc luciferase. In  
590 key, "Phosphate" denotes phosphorylated Ser/Thr residues. B) Two representative GPCRs,  
591  $\beta$ 1AR and NTSR1 illustrate data obtained for  $\beta$ -arrestin recruitment by NanoBiT assay shown in  
592 panel A. Data were collected over time after agonist addition ( $t=0$  min), and values are shown as  
593 luminescence fold-change (over vehicle treatment)  $\pm$  standard deviation (measured as 2 technical  
594 replicates for each of  $n=3$  independent experiments). Colors denote concentrations of agonist  
595 used for stimulation. Agonists used were isoproterenol for  $\beta$ 1AR and neurotensin for NTSR1.  
596 Grey boxes mark the time region (10-15 minutes post agonist addition) over which luminescence  
597 is integrated, for each concentration of agonist, to produce concentration response curves  
598 (bottom). WT and 3Q amplitudes were determined as the difference of fitted pre- and post-  
599 transition plateaus. C) Plot of LOF values for panel of tested GPCRs. Points represent LOF value  
600 obtained as ratio of WT and 3Q recruitment, and error bars reflect error in LOF derived from  
601 standard errors of fits (see methods). Dashed ellipses denote clusters obtained from k means



602 clustering of data (see methods). Vertical grey lines denote LOF = 0 and LOF = 1; vertical purple  
603 and orange lines reflect the centers of the respective clusters from k means and correspond to  
604 LOF = 0.06 and LOF = 0.73, respectively.

605  
606 Figure 2. Receptor phosphorylation patterns govern PIP-dependence for arrestin recruitment. A)  
607 Left, schematic of human NTSR1 showing motifs in receptor ICL3 and C-terminus that are subject  
608 to phosphorylation. Phosphorylation sites examined in this study are shown in red and numbered  
609 1-10 (above). Residue numbers corresponding to the region of human NTSR1 are listed at the  
610 start and end of the shown sequences. Construct key shows possible phosphosites as empty  
611 boxes, which when mutated to alanine are filled with an "X". Plasma membrane recruitment of  
612 arrestin upon stimulation of cells expressing different NTSR1 constructs, measured using the  
613 NanoBiT assay described in Figure 1. Points represent LOF value obtained as ratio of WT and  
614 3Q recruitment, and error bars represent standard error of fits (see methods). Points are colored  
615 based on cluster designation obtained from k means clustering of all receptor-arrestin recruitment  
616 data. B) Translocation of  $\beta$ arr1 to endosomes upon stimulation of cells expressing different  
617 NTSR1 constructs, measured using an endosome bystander NanoBiT assay, as described in  
618 Figure S1. Points represent recruitment (fold change over basal upon stimulation) for WT and 3Q  
619 recruitment, denoted by circles and triangles, respectively. Points are based on data from  $n=3$   
620 biological experiments. Error bars represent standard error of fit used to determine recruitment.  
621 Points are colored based on the cluster assignment of that mutant. C) Internalization, measured  
622 by loss of cell-surface receptors upon agonist stimulation, for  $\Delta\beta$ arr1/2 cells expressing NTSR1  
623 or  $\beta$ 2AR constructs and transfected with arrestin constructs indicated. Values represent  
624 independent experiments ( $n = 5-10$ ). Internalization by 3Q  $\beta$ arr1 and mock were compared to WT  
625 using a two-tailed paired t-test. ns:  $p > 0.05$ ; \*:  $p \leq 0.05$ ; \*\*:  $p \leq 0.01$ ; \*\*\*:  $p \leq 0.001$ ; \*\*\*\*:  $p \leq$   
626 0.0001.

627  
628 Figure 3. Lipid binding stabilizes core-engaged arrestin complexes. A) cartoon of complexing  
629 efficiency assay. Size-exclusion chromatography (SEC) resolves complex from components. B)  
630 Representative experiment showing SEC chromatograms with vertical dashed lines indicating  
631 free NTSR1, complex, and free arrestins. C) Complexing efficiency, for NTSR1 with indicated  
632 arrestins. Boxplots: center line, median; box range, 25–75th percentiles; whiskers denote  
633 minimum–maximum values. Individual points are shown ( $n=6$  independent experiments). Two-  
634 tailed unpaired t-test used to compare conditions. ns:  $p > 0.05$ ; \*\*\*\*:  $p \leq 0.0001$ . D) Cartoon  
635 showing equilibrium of NTSR1-arrestin complex. Pink star denotes L68BIM probe used for  
636 experiment shown in panel E. E) Bimane spectra for L68BIM labeled  $\beta$ arr1 in complex with  
637 NTSR1. All NTSR1 samples contained diC8-PI(4,5)P2 (4.1  $\mu$ M) Boxplots: center line, median;  
638 box range, 25–75th percentiles; whiskers denote minimum–maximum values. Individual points  
639 are shown ( $n=3$  independent experiments). V2Rpp-NTSR1 (GRK5p) and V2Rpp-NTSR1  
640 (unphos) + V2Rpp were compared by two-tailed unpaired t-test. ns:  $p > 0.05$ ; \*:  $p \leq 0.05$ . Apo  
641 indicates free arrestin without any ligand present; unphos indicates unphosphorylated receptor  
642 and GRK5p indicates GRK5-in vitro phosphorylated receptor. Spectra are normalized to apo  
643 (100%) within each experiment and the fluorescence intensity at lambda max was used as the  
644 value. F) Free energy diagram illustrating how PIP-binding, by stabilizing the core-engaged state  
645 of the NTSR1-arrestin complex slows arrestin dissociation. Loss of the PIP-binding element of  
646 arrestin destabilizes the core-engaged state, shifting equilibrium towards the tail-engaged state  
647 leading to a higher degree of complex disassembly. Removal of the arrestin C-terminus stabilizes  
648 the complex in the tail-engaged state and reduces disassembly even when core-engaged  
649 complex is destabilized by lack of PIP-binding.

650

651 Figure 4. PIP2 alone promotes conformational changes in arrestin, including C-tail movement, but  
652 not release. A) overlay of inactive (PDB: 1G4M) [grey] and active (PDB: 4JQI) [black]  $\beta$ arr1. The  
653 N and C lobes of  $\beta$ arr1 are indicated. Activation leads to reorganization of several loops, and the  
654 gate loop and finger loop are highlighted. Re-orientation of these loops from inactive (yellow) to  
655 active (green) can be monitored by site-specific fluorescence spectroscopy. In finger loop inset  
656 the sphere denotes  $C_{\alpha}$  L68C which is labeled with BIM. In gate loop inset, the sphere denotes  
657 Ca L293C which is labeled with NBD. An installed W residue replacing L167 dynamically  
658 quenches 293NBD. B) Spectra of bimane labeled (L68C)  $\beta$ arr1 in response to V2Rpp and PIP2.  
659 Arrow indicates direction of spectral shift with increasing concentration. Values are mean  $\pm$  SD  
660 ( $n=3$  independent experiments). Spectra were normalized to the apo condition within a given  
661 experiment. C) Spectra of NBD labeled (L167W-L293C)  $\beta$ arr1 in response to V2Rpp and PIP2.  
662 Arrow indicates direction of spectral shift with increasing concentration. Spectra shown are from  
663 a single experiment shown ( $n=1$  independent experiments). Spectra were normalized to the apo  
664 condition. D) Cartoon showing how FRET change is linked to C-tail release, left. Right, spectra of  
665 AF488/AT647N labeled (A12C-V387C)  $\beta$ arr1 in response to V2Rpp and PIP2. Arrow indicates  
666 direction of spectral shift with increasing concentration. Spectra were normalized via donor  
667 intensity within a given experiment. Data shown are for a representative experiment.  
668

669 Figure 5. PIP2 enhances Fab30 binding to  $\beta$ arr1. A) Cartoon of surface plasmon resonance (SPR)  
670 experiments, where  $\beta$ arr1 is immobilized via N-terminal biotinylation and a Fab30 binder is  
671 injected in the presence of absence of arrestin ligands, lipids or V2Rpp. B) Representative  
672 sensogram for SPR binding experiment. With WT  $\beta$ arr1 immobilized, Fab30 (1  $\mu$ M) was injected  
673 together with either no ligand, V2Rpp (40  $\mu$ M) or di-C8-PIP2 (40  $\mu$ M). The shown sensogram is  
674 representative of the outcome seen for independent experiments ( $n=3$ ) (see also panel C). C)  
675 Binding of Fab30 to immobilized arrestin constructs in the presence of different arrestin ligands.  
676 Maximum binding is defined based on normalization of the observed response to the amount of  
677 arrestin immobilized for each construct. Ligands di-C8-PG (40  $\mu$ M), di-C8-PI(3)P (40  $\mu$ M), di-C8-  
678 PI(4,5)P2 (40  $\mu$ M) and V2Rpp (40  $\mu$ M) were mixed with Fab30 (1  $\mu$ M) and injected together.  
679 Points reflect independent measurements; open points represent the binding observed for the  
680 ligand in the absence of Fab30. Fab30 binding was compared using a two-tailed unpaired t-test.  
681 ns:  $p > 0.05$ ; \*:  $p \leq 0.05$ ; \*\*:  $p \leq 0.01$ ; \*\*\*:  $p \leq 0.001$ .  
682

683 Figure 6. Model for phosphoinositide regulation of GPCR- $\beta$ -arrestin complex assembly and  
684 disassembly. GPCRs stratify into two groups with respect to the strength of their interaction with  
685  $\beta$ -arrestins: one group requires an interaction between  $\beta$ -arrestin and PIP2 at the plasma  
686 membrane for recruitment (PIP-dependent), while the other does not (PIP-independent). In the  
687 case of PIP-dependent GPCRs, arrestin engagement is unstable and can result in dissociation of  
688 arrestin from the receptor, while maintaining an association with the plasma membrane (left  
689 panel). PIP2 is enriched at CCSs and in both cases complex assembly can occur. During  
690 endocytosis, PIP2 is depleted and for PIP-dependent GPCRs, the loss of this PIP2 contact may  
691 facilitate dissociation of arrestin thereby allowing for receptor recycling. In contrast, a PIP-  
692 independent GPCR will retain the interaction with arrestin even once PIP2 is depleted owing to  
693 the strong phosphorylation-dependent interactions; however, the full-engaged state of the  
694 complex is less stable in endosomes than at the plasma membrane, thereby allowing further G  
695 protein engagement to occur.  
696

## 697 **Methods**

698

## 699 **Plasmids**

700

701 For cell-based assays, we used human, full-length GPCR plasmids cloned into the pCAGGS  
702 vector or the pcDNA3.1 vector derived from a previous study (Inoue et al., 2019). GPCR  
703 constructs were N-terminally FLAG epitope-tagged when they were intended to compare with cell  
704 surface expression levels. Specifically, NTSR1 was fused to the N-terminal FLAG epitope tag with  
705 a linker (MDYKDDDDKGTELGS; the FLAG epitope tag is underlined) and inserted into the  
706 pcDNA3.1 vector.  $\beta$ 2AR and  $\mu$ OR were fused to the N-terminal FLAG epitope tag with a preceding  
707 HA-derived signal sequence and a flexible linker  
708 (MKTIIALSYIFCLVFADYKDDDDKGGSGGGSGGSSSGGG) and inserted into the pCAGGS  
709 vector. Unless otherwise noted, other GPCR constructs were untagged. For the bystander  
710 NanoBiT-based  $\beta$ -arrestin assays, human full-length  $\beta$ -arrestin ( $\beta$ -arrestin1 or 2; WT or 3Q) was  
711 N-terminally SmBiT-fused with the flexible linker (MVTGYRLFEEILGGSGGGSGGSSSGGG; the  
712 SmBiT is underlined) and inserted into the pCAGGS vector (SmBiT- $\beta$ -arrestin) (Baidya et al.,  
713 2020a). For the plasma membrane-localizing tag, LgBiT was C-terminally fused to the CAAX motif  
714 derived from human KRAS (SSSGGGKKKKKSKTKCVIM) through the same flexible linker  
715 (LgBiT-CAAX). For the endosome-localizing tag, LgBiT was N-terminally fused with the human  
716 Endofin FYVE domain (amino-acid regions Gln739-Lys806) again through the same flexible linker  
717 (Endo-LgBiT). For the direct NanoBiT-based  $\beta$ -arrestin assay, human full-length  $\beta$ -arrestin was  
718 N-terminally LgBiT-fused with the same flexible linker and inserted into the pCAGGS vector  
719 (LgBiT- $\beta$ -arrestin). GPCRs were C-terminally SmBiT-fused with the flexible linker  
720 (GGSGGGSGGSSSGVTGYRLFEEIL; the SmBiT is underlined) and inserted into the  
721 pCAGGS vector (GPCR-SmBiT).

722

## 723 Peptides

724

725 The V2Rpp peptide (ARGRpTPPpSLGPQDEpSCpTpTApSpSpSLAKDTSS) was obtained by  
726 custom peptide synthesis (Tufts University Core Facility). Fab30 was expressed and purified as  
727 previously described (Shukla et al., 2013). The concentration of V2Rpp stocks were determined  
728 by reaction with Ellman's reagent as previously described (Latorraca et al., 2020).

729

## 730 NanoBiT- $\beta$ -arrestin recruitment assays

731

732  $\beta$ -arrestin recruitment to the plasma membrane was measured by the bystander NanoBiT- $\beta$ -  
733 arrestin assays using the SmBiT- $\beta$ -arrestin and the LgBiT-CAAX constructs. HEK293A cells  
734 (Thermo Fisher Scientific) were seeded in a 6-cm culture dish (Greiner Bio-One) at a  
735 concentration of  $2 \times 10^5$  cells per ml (4 ml per dish hereafter) in DMEM (Nissui Pharmaceutical)  
736 supplemented with 10% FBS (Gibco), glutamine, penicillin, and streptomycin, one day before  
737 transfection. The transfection solution was prepared by combining 5  $\mu$ l of polyethylenimine  
738 solution (1 mg/ml) and a plasmid mixture consisting of 100 ng SmBiT- $\beta$ -arrestin, 500 ng LgBiT-  
739 CAAX and 200 ng of a test GPCR construct in 200  $\mu$ l of Opti-MEM (Thermo Fisher Scientific). For  
740 the NTSR1 titration experiment, diluted volume of the FLAG-NTSR1 plasmid (13 ng to 200 ng)  
741 was transfected with 100 ng SmBiT- $\beta$ -arrestin and 500 ng LgBiT-CAAX with a balanced volume  
742 of the pcDNA3.1 vector (total plasmid volume of 800 ng). After an incubation for one day, the  
743 transfected cells were harvested with 0.5 mM EDTA-containing Dulbecco's PBS, centrifuged, and  
744 suspended in 2 ml of Hank's balanced saline solution (HBSS) containing 0.01% bovine serum  
745 albumin (BSA fatty acid-free grade, SERVA) and 5 mM HEPES (pH 7.4) (assay buffer). The cell  
746 suspension was dispensed in a white 96-well plate (Greiner Bio-One) at a volume of 80  $\mu$ l per  
747 well and loaded with 20  $\mu$ l of 50  $\mu$ M coelenterazine (Carbosynth), diluted in the assay buffer. After  
748 2 h incubation at room temperature, the plate was measured for its baseline luminescence  
749 (SpectraMax L, 2PMT model, Molecular Devices). Thereafter, 20  $\mu$ l of 6X ligand serially diluted  
750 in the assay buffer were manually added. The ligand used was dependent on the GPCR

751 expressed, as described in Supplementary Data Table 1. The plate was immediately read for the  
752 second measurement as a kinetics mode and luminescence counts recorded for 15 min with an  
753 accumulation time of 0.18 sec per read and an interval of 20 sec per round.  $\beta$ -arrestin endosomal  
754 translocation was measured by following the same procedure as described above but using the  
755 SmBiT- $\beta$ -arrestin and the Endo-LgBiT constructs. Similarly, direct recruitment was measured by  
756 the same protocol as described above but using LgBiT- $\beta$ -arrestin (500 ng) and C-terminally fused-  
757 SmBiT GPCR (500 ng) constructs. For every well, the recorded kinetics data were first normalized  
758 to the baseline luminescence counts.

## 759 **Analysis of cell-based recruitment data**

760 NanoBiT data were analyzed by converting kinetic data into concentration-response data by  
761 determining an average fold-change (relative to signal pre-stimulation) from 10-15 minutes post-  
762 agonist addition. At least three independent experiments were performed for each receptor-  
763 sensor combination. Concentration-dependent data from two technical replicates for each  
764 independent experiment were collectively fit to a four-parameter log logistic function (LL2.4)  
765 provided in the drc package of the statistical environment R. This equation, of the form:  $f(x) =$   
766  $c + \frac{d-c}{1+e^{(b(\log(x)-\log(e)))}}$  provides pre- and post-transition values, c and d, respectively, that define the  
767 amplitude response for that assay. Cutoffs for bystander NanoBiT experiments were determined  
768 as based on a limit of detection of 3s over the response of mock-transfected cells. Amplitude  
769 values were defined as amplitude = top – bottom of fit, and amplitude error was calculated as  
770  $\delta(\text{amplitude}) = \sqrt{(\delta\text{top})^2 + (\delta\text{bottom})^2}$ . Converting amplitude to LOF for each assay was based  
771 on the formula:  $1 - \text{amplitude}(3Q)/\text{amplitude}(WT)$ . Errors for LOF were calculated as:

772  $\delta(\text{LOF}) = \text{LOF} \sqrt{\left(\frac{\delta\text{amplitude}(3Q)}{\text{amplitude}(3Q)}\right)^2 + \left(\frac{\delta\text{amplitude}(WT)}{\text{amplitude}(WT)}\right)^2}$ . In cases where a fit failed to converge due  
773 to weak recruitment, these amplitudes and errors were set to zero. Recruitment of  $\beta$ arr1 (3Q) to  
774 D1R in both plasma membrane bystander (CAAX) and direct recruitment which was set to zero.  
775 The error amplitude for  $\beta$ arr1 (3Q) endosome translocation assay with D1R was also set to zero.  
776 The error amplitude for  $\beta$ arr1 (3Q) endosome translocation assay with S1PR1 was set to zero,  
777 and the “top” value of the fit was set to 1.2 based on manual inspection. K means clustering was  
778 performed using pre-built functions in the tidyverse package of R. The number of clusters was  
779 varied from 1 to 10 and an elbow plot of within cluster sum of squares vs k suggested 2 clusters  
780 fit the data well.

781 For recruitment kinetics, luminescence fold-change was plotted against time, and the values from  
782 zero to five minutes (initial rate) were fit to a logistic function of the form:  $f(x) = \frac{L}{1+e^{-k(x-x_0)}}$ , where  
783 L is the curve’s maximum value,  $x_0$  is the value of the sigmoid midpoint and k is the logistic growth  
784 rate. Fitting was done using the self-starting SSlogis four parameter nls function in the tidyverse  
785 package of R.

## 786 **GPCR internalization assay**

787 GPCR internalization assays was performed as described previously with minor modifications  
788 (Grundmann et al., 2018).  $\Delta\beta$ arr1/2 double knockout (DKO) cells, previously described (O’Hayre  
789 et al., 2017), were seeded in 6-cm dishes at concentration of  $2 \times 10^5$  cells/ml (4 mL per dish) and  
790 cultured for 1 day before transfection. The cells were transfected with 1  $\mu$ g of the N-terminally  
791 FLAG-tagged NTSR1 or the  $\beta$ 2AR construct, along with 200 ng of the WT or 3Q  $\beta$ arr1 or empty  
792 plasmid, using PEI transfection reagent as described above. After 1-day culture, the transfected  
793 cells were harvested by EDTA-PBS and HEPES-HBSS and, following centrifugation, the cells



799 were suspended in 500  $\mu$ L of 0.01% BSA-containing HEPES-HBSS. The cell suspension was  
800 dispensed in a 96-well V-bottom plate (100  $\mu$ L per well) and mixed with 100  $\mu$ L of 2x GPCR  
801 solution ligand (2  $\mu$ M neurotensin for FLAG-NTSR1 or 20  $\mu$ M Isoproterenol (Sigma-Aldrich) for  
802 FLAG- $\beta$ 2AR). After 30-min incubation in a CO<sub>2</sub> incubator, the plate was centrifuged at 1,500 g for  
803 5 min and the cells were washed twice with D-PBS. The cell pellets were suspended in 2% goat  
804 serum- and 2 mM EDTA-containing D-PBS (blocking buffer; 100  $\mu$ L per well) and incubated for  
805 30 min on ice. After centrifugation, the cells were stained with anti-FLAG-epitope tag monoclonal  
806 antibody (Clone 1E6, FujiFilm Wako Pure Chemicals; 10  $\mu$ g mL<sup>-1</sup> in the blocking buffer; 25  $\mu$ L  
807 per well) for 30 min on ice. After washing with D-PBS, the cells were labeled with a goat anti-  
808 mouse IgG secondary antibody conjugated with Alexa Fluor 647 (Thermo Fisher Scientific; 10  $\mu$ g  
809 mL<sup>-1</sup> dilution in the blocking buffer; 25  $\mu$ L per well) for 15 min on ice. The cells were washed once  
810 with D-PBS, resuspended in 100  $\mu$ L of 2 mM EDTA-containing-D-PBS and filtered through a 40  
811  $\mu$ m filter. The fluorescently labeled cells (approximately 20,000 cells per sample) were analyzed  
812 by the EC800 flow cytometer (Sony). Fluorescent signal derived from Alexa Fluor 647 was  
813 recorded in the FL3 channel. Mean fluorescence intensity (MFI) from all of the recorded events  
814 was analyzed by a FlowJo software (FlowJo) and used for statistical analysis.

815

### 816 **Cell-surface expression analysis by flow cytometry**

817

818 HEK293A cells were seeded in a 6-well culture plate at concentration of 2 x 10<sup>5</sup> cells/ml (2 mL  
819 per dish) and cultured for 1 day before transfection. The cells were transfected with 1  $\mu$ g of N-  
820 terminally FLAG-tagged GPCR construct using PEI transfection reagent as described above and  
821 cultured for 1 day. The cells were collected by adding 200  $\mu$ l of 0.53 mM EDTA-containing  
822 Dulbecco's PBS (D-PBS), followed by 200  $\mu$ l of 5 mM HEPES (pH 7.4)-containing Hank's  
823 Balanced Salt Solution (HBSS). The cell suspension was transferred to a 96-well V-bottom plate  
824 in duplicate and fluorescently labeled with the anti-FLAG epitope tag antibody and a goat anti-  
825 mouse IgG secondary antibody conjugated with Alexa Fluor 488 (Thermo Fisher Scientific, 10  $\mu$ g  
826 per ml diluted in the blocking buffer) as described above. Live cells were gated with a forward  
827 scatter (FS-Peak-Lin) cutoff at the 390 setting, with a gain value of 1.7 and fluorescent signal  
828 derived from Alexa Fluor 488 was recorded in the FL1 channel. For each experiment, the MFI  
829 value of mutants was normalized to that of WT performed in parallel.

830

### 831 **cAMP desensitization**

832

833 HEK293  $\Delta$  $\beta$ arr1/2 (DKO) cells that endogenously express  $\beta$ 2AR were seeded into 6-well plates and  
834 transiently transfected after 24 hours with mApple,  $\beta$ arr2-mApple, or  $\beta$ arr2(3Q)-mApple. Twenty-four  
835 hours after transfection, cells were transduced with CMV cADDis Green Upward cAMP sensor  
836 according to manufacturer instructions without addition of sodium butyrate (Montana Molecular  
837 #U0200G) and seeded in triplicate in a black clear-bottom 96-well plate (Corning cat# 3340). Twenty-  
838 four hours after transduction, the cells were washed once with 37°C assay buffer [135 mM NaCl, 5  
839 mM KCl, 0.4 mM Mg<sub>2</sub>Cl<sub>2</sub>, 1.8 mM CaCl<sub>2</sub>, 5 mM glucose, 20 mM HEPES pH 7.4], loaded into the pre-  
840 warmed 37°C plate reader (Biotek Synergy H4), and equilibrated for five minutes. Prior to beginning  
841 the kinetic assay, mApple was read using monochromoters set to Ex:568/9.0 and Em:592/13.5. Then  
842 cADDis was read using monochromoters set to Ex:500/9.0 and Em:530/20.0. Three cADDis  
843 timepoints were collected to establish baseline, the plate was ejected, isoproterenol in 37°C assay  
844 buffer was added to a final concentration of 100 nM, and the plate was returned to continue collection.  
845 Thirty minutes after isoproterenol addition, 3-isobutyl-1-methylxanthine (IBMX) and forskolin (Fsk) in  
846 37°C assay buffer were added to a final concentrations of 300  $\mu$ M and 10  $\mu$ M respectively. Responses  
847 were averaged across technical replicates, normalized to the maximum Fsk/IBMX response, and then

848 averaged across independent experiments. Expression levels for cADDIs and  $\beta$ arr2 were  
849 normalized based on fluorescence.

850

## 851 **Western blotting**

852

853 HEK293A cells were transfected with the SmBiT- $\beta$ -arrestin and the LgBiT-CAAX constructs by  
854 following the procedure described in the NanoBiT-based  $\beta$ -arrestin assay. After 1-day culture, the  
855 transfected cells were lysed by SDS-PAGE sample buffer (62.5 mM Tris-HCl (pH 6.8), 50 mM  
856 dithiothreitol, 2% SDS, 10% glycerol and 4 M urea) containing 1 mM EDTA and 1 mM  
857 phenylmethylsulfonyl fluoride. Lysates derived from an equal number of cells were separated by  
858 8% SDS-polyacrylamide gel electrophoresis. Subsequently, the proteins were transferred to  
859 PVDF membrane. The blotted membrane was blocked with 5% skim milk-containing blotting  
860 buffer (10 mM Tris-HCl (pH 7.4), 190 mM NaCl and 0.05% Tween 20), immunoblot with primary  
861 (1  $\mu$ g per mL, unless otherwise indicated) and secondary antibodies conjugated with horseradish  
862 peroxidase (1:2000 dilution). Primary antibodies used in this study were: anti- $\beta$ -arrestin1 (rabbit  
863 monoclonal; CST, #12697, D8O3J), anti- $\beta$ -arrestin2 antibody (rabbit monoclonal; CST, #3857,  
864 C16D9) and anti- $\alpha$ -tubulin antibody (mouse monoclonal, clone DM1A; Santa Cruz  
865 Biotechnologies, sc-32293; 1:2000 dilution). Secondary antibodies were anti-rabbit IgG (GE  
866 Healthcare, NA9340) and anti-mouse IgG (GE Healthcare, NA9310). Membrane was soaked with  
867 an ImmunoStar Zeta reagent (FujiFilm Wako Pure Chemical). Chemiluminescence image of the  
868 membrane was acquired, and band intensity was analyzed with Amersham Imager 680 (Cytiva).

869

## 870 **NTSR1 expression and purification**

871

872 Full length human NTSR1 was modified with an N-terminal Flag tag followed by an octa-histidine  
873 tag and cloned into pFastBac1 vector. NTSR1 was expressed in Sf9 insect cells (Expression  
874 Systems) using a FastBac-derived baculovirus. Cells were infected at a density of  $4 \times 10^6$  cells/mL  
875 and harvested 60 hrs post infection. Cells were lysed in hypotonic buffer (10 mM HEPES, pH 7.4,  
876 and protease inhibitors) and solubilized at 4 °C for 2 hours in a buffer containing 1% lauryl maltose  
877 neopentyl glycol (LMNG, Anatrace), 0.1% cholesteryl hemisuccinate tris salt (CHS, Steraloids),  
878 0.3% sodium cholate (Sigma), 20 mM HEPES 7.4, 500 mM NaCl, 25% glycerol, iodoacetamide  
879 (to cap cysteine residues) and protease inhibitors. Insoluble debris was removed by centrifugation  
880 and the supernatant was incubated with Ni-NTA (Qiagen) resin for 1 hour at 4 °C. The resin was  
881 washed in batch with buffer containing 0.01% LMNG, 0.001% CHS, 0.003% sodium cholate, 20  
882 mM HEPES pH 7.4, 500 mM NaCl, 10 mM imidazole and eluted with the same buffer  
883 supplemented with 200 mM imidazole, 2 mM  $\text{CaCl}_2$  and 10  $\mu$ M NTS<sub>8-13</sub> (Acetate salt, Sigma). The  
884 eluate was loaded onto M1 FLAG immunoaffinity resin and washed with buffer containing 0.01%  
885 LMNG, 0.001% CHS, 0.003% sodium cholate, 20 mM HEPES pH 7.4, 500 mM NaCl, 10 mM  
886 imidazole, 0.1  $\mu$ M NTS<sub>8-13</sub> and 2 mM  $\text{CaCl}_2$ . The receptor was eluted with buffer containing 100  
887 mM NaCl, 20 mM HEPES pH 7.4, 0.005% LMNG, 0.005% CHS, 1  $\mu$ M NTS<sub>8-13</sub>, 0.2 mg/mL flag  
888 peptide (DYKDDDDK) and 5 mM EDTA. Elution fractions containing receptor were pooled and  
889 subjected to polishing by SEC on a Superdex 200 Increase 10/300 GL column (GE Healthcare)  
890 in 20 mM HEPES, pH 7.4, 100 mM NaCl, 0.0025% LMNG, 0.00025% CHS, and 0.1  $\mu$ M NTS<sub>8-13</sub>.  
891 Peak fractions were pooled and concentrated to 200  $\mu$ M and aliquots were flash-frozen and stored  
892 at -80 °C until use.

893

## 894 **GRK5 expression and purification**

895

896 Full length human GRK5 was modified with a C-terminal hexa-histidine tag and cloned into  
897 pVL1392 vector for baculovirus production. GRK5 was expressed and purified as previously

898 published (Beyett et al., 2019). Briefly, Sf9 insect cells (Expression Systems) were infected with  
899 a BestBac-derived baculovirus at a density of  $3.5 \times 10^6$  cells/mL and harvested 48 hours post  
900 infection. Cells were resuspended, lysed by sonication and the supernatant was applied to Ni-  
901 NTA resin. The resin was washed with lysis buffer and GRK5 eluted with lysis buffer  
902 supplemented with 200 mM imidazole. The combined eluate was then subjected to cation-  
903 exchange chromatography using a MonoS 10/100 column (GE healthcare) and eluted with a  
904 linear gradient of NaCl. Fractions containing GRK5 were combined and run on a Superdex 200  
905 10/300 GL column (GE healthcare). GRK5 was aliquoted, flash frozen, and stored at  $-80^\circ\text{C}$  until  
906 use.

907

### 908 **Arrestin expression and purification**

909

910 The parent construct for  $\beta$ -arrestin 1 ( $\beta$ arr1) is the long splice variant of human, cysteine-free  
911 (C59V, C125S, C140L, C150V, C242V, C251V, C269S)  $\beta$ -arrestin 1. This construct is modified  
912 with an N-terminal 6x Histidine tag, followed by a 3C protease site, a GG linker, AviTag and  
913 GGSGGS linker. The sequence was codon-optimized for expression in *E. coli* and cloned into a  
914 pET-15b vector. Point mutations were prepared using site-directed mutagenesis.  $\beta$ -arrestin 1 (1-  
915 382) was prepared by truncating  $\beta$ -arrestin 1 at residue 382. All arrestin constructs used were  
916 prepared as follows: NiCo21(DE3) competent *E. coli* (NEB) were transformed, and large-scale  
917 cultures were grown in TB + ampicillin at  $37^\circ\text{C}$  until an  $\text{OD}_{600}$  of 1.0. Cells were then transferred  
918 to room temperature and induced with  $25 \mu\text{M}$  IPTG when the  $\text{OD}_{600}$  reached 2.0. Cells were  
919 harvested 20 h post induction and resuspended in lysis buffer (50 mM Hepes pH 7.4, 500 mM  
920 NaCl, 15% glycerol, 7.13 mM BME) to a final volume of 40 mL/L of cells. Cells were lysed by  
921 sonication and the clarified lysate applied to nickel sepharose and batch incubated for 1.5h at  $4^\circ\text{C}$ .  
922 The resin was washed with 10 column volumes of wash buffer (20 mM HEPES pH 7.4, 500  
923 mM NaCl, 10% glycerol, 7.13 mM BME) + 20 mM imidazole, followed by 10 column volumes of  
924 wash buffer + 40 mM imidazole. The protein was then eluted with 5 column volumes of wash  
925 buffer + 200mM imidazole and dialyzed overnight in 100x volume of dialysis buffer (20 mM Hepes  
926 7.4, 200 mM NaCl, 2 mM BME, 10% glycerol) in the presence of 1:10 (w:w) of 3C protease. The  
927 digested protein was then subjected to reverse-Nickel purification and diluted with dialysis buffer  
928 containing no NaCl to bring the NaCl concentration to 75mM. The protein was then purified by ion  
929 exchange chromatography (mono Q 10/100 GL, GE Healthcare), followed by SEC using a  
930 Superdex 200 increase 10/300 GL column (GE Healthcare) with SEC buffer (20 mM HEPES pH  
931 7.4, 300 mM NaCl, 10% glycerol). Purified protein was concentrated to between 100-300  $\mu\text{M}$   
932 using a 30 kDa spin concentrator and aliquots were flash-frozen in liquid nitrogen and stored at -  
933  $80^\circ\text{C}$  until use.

934

### 935 **Arrestin labeling and biotinylation**

936

937 Following SEC, elution peak fractions were pooled to a concentration of 10-20  $\mu\text{M}$  and labeled  
938 with fluorophore(s): monobromobimane (mBBr), Thermo Fisher Scientific M1378; N,N'-Dimethyl-  
939 N-(Iodoacetyl)-N'-(7-Nitrobenz-2-Oxa-1,3-Diazol-4-yl)Ethylendiamine (IANBD amide), Thermo  
940 Fisher Scientific D2004; or a 1:3 mixture of Alexa Fluor 488 C5 Maleimide, Thermo Fisher  
941 Scientific A10254, and Atto647N Maleimide, ATTO TEC AD647N-41, respectively. Fluorophores  
942 were dissolved to in DMSO and added at 10x molar excess over protein, then allowed to react for  
943 1 h at room temperature prior to quenching with cysteine (10x molar excess over fluorophore).  
944 The labeling reaction was further incubated for 10 minutes after cysteine addition, after which  
945 samples were spin filtered and subjected to a second round of size-exclusion chromatography,  
946 as detailed above, to remove free dye. The purified, was concentrated to between 100-300  $\mu\text{M}$

947 using a 30 kDa spin concentrator and aliquots were flash-frozen in liquid nitrogen and stored at -  
948 80 °C until use.

949 Arrestins (SEC-pure) were biotinylated using recombinant BirA enzyme, according to commercial  
950 protocols (Avidity), with exception that biotinylation was carried out for 12 h at 4 °C, rather than  
951 30 °C. After biotinylation was complete, the reaction was flowed over 100 µL (packed) of nickel  
952 Sepharose, equilibrated in arrestin SEC buffer and supplemented with 10 mM imidazole, then  
953 washed with 200 µL of the equilibration buffer. The combined flow-through and wash fractions  
954 were then purified by size-exclusion as described above.

### 956 **NTSR1 phosphorylation**

957  
958 NTSR1 (2.5 µM) was equilibrated in phosphorylation buffer (20 mM bis-tris propane (BTP) pH  
959 7.5, 35 mM NaCl, 5 mM MgCl<sub>2</sub>, 20 µM NTS<sub>8-13</sub>, 20 µM C8-PI(4,5)P<sub>2</sub>, 0.05 mM TCEP, 0.002%  
960 MNG, 0.0002% CHS) at 25 °C with gentle mixing for 1 h. GRK5 was added to the reaction to a  
961 final concentration of 200 nM, and briefly incubated while the reaction was warmed from 25 °C to  
962 30 °C. ATP was added to a final concentration of 1 mM. Upon completion, the reaction was  
963 supplemented with CaCl<sub>2</sub> to a final concentration of 2 mM and applied to an equilibrated M1 FLAG  
964 immunoaffinity resin and washed with buffer containing 0.004% LMNG, 0.004% CHS, 20 mM  
965 HEPES pH 7.4, 100 mM NaCl, 0.2 µM NTS<sub>8-13</sub>, 2 mM CaCl<sub>2</sub>. The receptor was eluted with buffer  
966 containing 100 mM NaCl, 20 mM HEPES pH 7.4, 0.004% LMNG, 0.004% CHS, 0.2 µM NTS<sub>8-13</sub>,  
967 0.2 mg/mL 1x flag peptide (DYKDDDDK), 5 mM EDTA), followed by SEC using a Superdex 200  
968 increase 10/300 GL column (GE Healthcare) with SEC buffer (20 mM HEPES pH 7.4, 100 mM  
969 NaCl, 0.004% LMNG, 0.0004% CHS).

### 971 **Analytical fluorescence-detection size-exclusion chromatography**

972  
973 In a final volume of 20 µL, NTSR1 (4.5 µM), the respective arrestin construct (9 µM), NTS<sub>8-13</sub>  
974 peptide (50 µM) and diC8-PI(4,5)P<sub>2</sub> (5 µM) were incubated in buffer containing 20 mM HEPES  
975 pH 7.4, 100 mM NaCl, 0.004% LMNG, 0.0004% CHS and 0.2 µM NTS<sub>8-13</sub>. Using a Prominence-i  
976 LC autosampler (Shimadzu), 10 µL was injected onto a ENrich size-exclusion chromatography  
977 650 10 × 300 column (Bio-rad) pre-equilibrated in 20 mM HEPES pH 7.4 100 mM NaCl, 0.004 %  
978 LMNG, 0.004% CHS and 0.2 µM NTS<sub>8-13</sub>, and run at a flow rate of 0.8 ml/min. Tryptophan  
979 fluorescence was monitored at λ(EX) of 280 nm and λ(EM) of 340 nm. Peaks in the obtained size-  
980 exclusion chromatograms were modeled as gaussians, deconvolved and quantified (AUC) using  
981 Magic Plot 3 (Magic Plot).

### 983 **Surface plasmon resonance measurements**

984  
985 SPR experiments were performed using a GE Biacore T100 instrument. Approximately 300-400  
986 resonance units (RU) of FPLC-purified biotinylated arrestin in HBS-P+ Buffer (GE Healthcare)  
987 were captured on an SA-chip (GE Healthcare), including a reference channel for online  
988 background subtraction of bulk solution refractive index and for evaluation of non-specific binding  
989 of analyte to the chip surface (Biacore T100 Control Software; GE Healthcare). All measurements  
990 were performed with 2-fold serial dilutions using 60 s association followed by a dissociation time  
991 of more than 240 s at 25 °C with a flow rate of at 30 µl min<sup>-1</sup>. Regeneration was performed by 2  
992 injections of 2 M MgCl<sub>2</sub> for 10 s at 50 µl min<sup>-1</sup> flow rate. Single cycle measurements were  
993 performed as described above. All single cycle measurements were performed as triplicates and  
994 quantifications calculated to the RU<sub>max</sub> of the individual immobilized ligands.

### 996 **Bulk fluorescence measurements**



997  
998 Bulk fluorescence measurements were performed on either a Fluorolog instrument (Horiba) using  
999 FluorEssence v3.8 software and operating in photon-counting mode, or a Tecan Infinite M1000  
1000 PRO multimodal microplate reader (Tecan). Fluorolog measurements of bimane-labeled  $\beta$ arr1  
1001 constructs (NTSR1 experiments) were performed at final concentration of 0.4  $\mu$ M [arrestin] in  
1002 buffer containing 20 mM HEPES pH 7.4, 100 mM NaCl and 0.004% LMNG (w/v)/0.0004% CHS  
1003 (w/v) supplemented with 4  $\mu$ M NTS(8-13). For NTSR1 experiments the following concentrations  
1004 were used: 4  $\mu$ M NTSR1, 4.1  $\mu$ M diC8-PI(4,5)P2, 50  $\mu$ M V2Rpp (depending on condition).  
1005 Samples were incubated for 1 h in the dark before measurement. Fluorescence data were  
1006 collected in a quartz cuvette with 135  $\mu$ L of sample. Bimane fluorescence was measured by  
1007 excitation at 370 nm with excitation and emission bandwidth passes of 3 nm, and emission spectra  
1008 were recorded from 400 to 550 nm in 2 nm increments with 0.1 s integration time. Care was taken  
1009 to extensively rinse and argon-dry the cuvette between individual measurements. To remove  
1010 background fluorescence, buffer spectra were collected using the same settings, and subtracted  
1011 from each sample spectrum.  
1012 FRET measurements of AF488-AT647N-labeled  $\beta$ arr1 constructs were performed as described  
1013 for bimane measurements, with the following differences: samples were excited at 476 nm with 3  
1014 nm excitation and 4 nm emission slit widths. Spectra were collected from 485 nm to 750 nm in 1  
1015 nm increments with 0.1 s integration time. FRET measurements in the absence of NTSR1 were  
1016 performed in buffer containing 20 mM HEPES pH 7.4, 100 mM NaCl and 0.004% LMNG  
1017 (w/v)/0.0004% CHS (no NTS). FRET measurements with NTSR1 were done with 0.5  $\mu$ M NTSR1  
1018 and 0.5  $\mu$ M diC8-PI(4,5)P2.  
1019 NBD and BIM spectra measured on the Tecan Infinite M1000 PRO were collected using 96-well  
1020 flat black Greiner plates with 100  $\mu$ L of sample at a final concentration of 0.5  $\mu$ M  $\beta$ arr1 in buffer  
1021 containing 20 mM HEPES pH 7.4, 100 mM NaCl and 0.004% LMNG (w/v)/0.0004% CHS. For  
1022 bimane the following instrument settings were used: excitation: 370 nm, emission 420-500 nm (1  
1023 nm steps) with 20 s read time and 400 Hz flash mode. For NBD the following instrument settings  
1024 were used: excitation: 490 nm, emission 510-580 nm (1 nm steps) with 20 s read time and 400  
1025 Hz flash mode. Gain and z-position were optimized prior to reading.

1026 Efret values for FRET experiments were calculated as  $E_{fret} = \frac{A}{(D+A)}$  and normalized to donor  
1027 intensity within a given experiment. Scaled FRET values (apo = 100, min(FRET) = 0) were fit to  
1028 a single exponential decay function  $Y = (Y_0 - plateau) * e^{-K*x} + plateau$  using the nls function  
1029 in R for EC<sub>50</sub> values. L167W-293NBD, if fit, was fit using the same function. L68BIM data was fit  
1030 to a total and non-specific binding model (based on GraphPad Prism 9) to obtain B<sub>max</sub> and K<sub>d</sub>  
1031 values.

### 1032 1033 **Supplemental Information titles and legends**

1034  
1035 Figure S1. Arrestin phosphoinositide binding is required for plasma membrane recruitment to  
1036 some GPCRs. A) cAMP response in HEK293 cells devoid of  $\beta$ -arrestins upon stimulation of  
1037 endogenous  $\beta$ 2AR with 100 nM isoproterenol (iso). Clone 1 (CL1) and Clone 2 (CL2) are  
1038 independent  $\beta$ arr1/2 knock-out cell lines (O'Hare et al. 2017). Data are normalized to response  
1039 with Forskolin (Fsk)/3-isobutyl-1-methylxanthine (IBMX) and show mean with 95% confidence  
1040 intervals (n=3 independent experiments). Two-way analysis of variance (ANOVA), Tukey's  
1041 multiple comparison test. For CL2 \* denotes p < 0.05 for WT vs. mApple over the interval of 17-  
1042 32 minutes, while 3Q vs. mApple was not significant. For CL1 \* denotes p < 0.05 for WT vs.  
1043 mApple over the interval of 19-29 minutes, while 3Q vs. mApple was not significant. B)  
1044 Quantification of expression for  $\beta$ arr1 and  $\beta$ arr2 (both WT and 3Q) NanoBiT constructs, as  
1045 determined by western blot (Supplementary data figure 2). Mean values of 3-4 independent

1046 experiments were compared by a two-tailed unpaired t-test, where ns denotes  $p > 0.05$ ,  $* P \leq$   
1047  $0.05$ . Boxplots: center line, median; box range, 25–75th percentiles; whiskers denote minimum–  
1048 maximum values. Individual points are shown. C) LOF is only weakly correlated with recruitment  
1049 of WT  $\beta$ -arrestins. Data are mean LOF and mean WT  $\beta$ arr1/2 recruitment.  $\beta$ arr1 recruitment is  
1050 shown as circles and  $\beta$ arr2 recruitment is shown as triangles. Data are colored based on assigned  
1051 cluster. Dashed line shows expected linear relationship and R is the Pearson coefficient, with -  
1052 0.51 reflecting a weak negative correlation. D) Plot of LOF data for plasma membrane bystander  
1053 (CAAX) vs. LOF for direct recruitment.  $\beta$ arr1 recruitment is shown as circles and  $\beta$ arr2 recruitment  
1054 is shown as triangles. Data are colored based on assigned cluster. Dashed line shows expected  
1055 linear relationship and R is the Pearson coefficient, with 0.88 reflecting a very strong positive  
1056 correlation. E) NanoBiT assay for measuring endosome translocation of  $\beta$ arr1. Cartoon of  
1057 endosome bystander assay (left).  $\beta$ arr1 endosome recruitment data (right) with dashed ellipses  
1058 to indicate clusters based on CAAX data.  $\beta$ -arrestin endosome recruitment determined by span  
1059 of luminescence fold change. Data are mean  $\pm$  SEM (n=3 independent experiments). Dashed line  
1060 indicates three times the maximum signal measured in mock (receptor) transfected cells.  
1061

1062 Figure S2. Loss of PIP binding slows  $\beta$ -arrestin recruitment to cluster 2 GPCRs. A) initial rate (0-  
1063 5 minutes post-agonist stimulation) expressed as luminescence fold-change (FC)/min. Data from  
1064 n=3 independent experiments fit independently (see methods). Boxplots: center line, median; box  
1065 range, 25–75th percentiles; whiskers denote minimum–maximum values. For each receptor, and  
1066 for each  $\beta$ arr1 and  $\beta$ arr2 WT and 3Q were compared by a two-tailed unpaired t-test, where ns  
1067 denotes  $p > 0.05$ ,  $* P \leq 0.05$ ,  $** P \leq 0.01$ ,  $**** P \leq 0.0001$ . B) Data from A) expressed as a  
1068 difference in rate shows that with the exception of  $\beta$ arr1-TACR1 all cluster 2 receptors show faster  
1069 recruitment of WT  $\beta$ -arrestin1/2 than corresponding 3Q mutant. Data are mean  $\pm$  SEM (n=3  
1070 independent experiments).  
1071

1072 Figure S3. Arrestin recruitment to NTSR1 mutants can be compared by NanoBiT assay. A)  
1073 Expression of NTSR1 constructs in HEK293A cells used for NanoBiT assays. Boxplots: center  
1074 line, median; box range, 25–75th percentiles; whiskers denote minimum–maximum values.  
1075 Individual points are shown. Values are mean, relative to NTSR1-WT (n=4 independent  
1076 experiments). For each construct, a comparison to NTSR1-WT by a two-tailed unpaired Wilcoxon  
1077 test was performed, where ns denotes  $p > 0.05$ ,  $* P \leq 0.05$ . B) NanoBiT Emax for Sm- $\beta$ arr1  
1078 interaction with Lg-CAAX for cells expressing NTSR1-WT as a function of mean fluorescence  
1079 intensity (MFI), as determined by cell-surface staining. Amount of NTSR1-WT DNA transfected is  
1080 written; arrow denotes 200 ng, the amount used in recruitment assays in Figure 2. C) As B, except  
1081 the pEC50 of recruitment response upon NTS stimulation is plotted instead of Emax. Emax and  
1082 pEC50 are mean  $\pm$  SD (n=2 independent experiments), MFI determined by cell-surface staining  
1083 are mean  $\pm$  SD (n=2 independent experiments).  
1084

1085 Figure S4. PIP binding stabilizes core-engaged arrestin complexes. A) LOF in complexing  
1086 efficiency as determined by SEC. LOF = 1 corresponds to complete loss of complex formation,  
1087 while LOF = 0 corresponds to no difference in complexing efficiency between WT and 3Q  $\beta$ arr1  
1088 (n=5 independent experiments). Boxplots: center line, median; box range, 25–75th percentiles;  
1089 whiskers denote minimum–maximum values. Individual points are shown. compared by a two-  
1090 tailed unpaired t-test, where  $**** P \leq 0.0001$ . B) Structure of transition from inactive (PDB: 1G4M)  
1091 to active (PDB: 4JQI)  $\beta$ arr1 involves displacement of the  $\beta$ arr1 C-tail (dark grey) by V2Rpp (blue).  
1092 Two cysteine residues were added to a cys-less  $\beta$ arr1 background at positions A12 and V387  
1093 (pink spheres). These positions were labeled with fluorophores that, through FRET, allow for  
1094 monitoring the position of the C-tail. C) When labeled with a FRET pair,  $\beta$ arr1-12C/387C shows  
1095 a high-FRET state in the absence of V2Rpp, and a low-FRET state when the  $\beta$ arr1 C-tail is

1096 displaced by V2Rpp (left). FRET measured when  $\beta$ arr1 (WT or 3Q)-12C/387C-AF488-AT647N is  
1097 bound to V2Rpp (0.5  $\mu$ M), NTSR1 (GRK5p, 0.5  $\mu$ M). All samples containing NTSR1 were  
1098 supplemented with diC8-PI(4,5)P2 (0.5  $\mu$ M). Apo  $\beta$ arr1 (WT or 3Q)-12C/387C-AF488-AT647N  
1099 was normalized to 1.0 and  $\beta$ arr1 (WT or 3Q)-12C/387C-AF488-AT647N + V2Rpp (10  $\mu$ M) was  
1100 normalized 0.0 for each experiment (n=3 independent measurements) (right). Boxplots: center  
1101 line, median; box range, 25–75th percentiles; whiskers denote minimum–maximum values.  
1102 Individual points are shown.

1103  
1104 Figure S5. PIP2 allosterically triggers movement of the arrestin C-tail, but not release. A-B) L68C-  
1105 bimane responses. %apo is scaled such that the fluorescence intensity (at  $\lambda_{max}$ ) for apo arrestin  
1106 is 100% and each condition is scaled as a factor of apo. ND denotes not determined values.  
1107 Values for  $B_{max}$  (max response) and  $K_d$  (based on single-site binding fitting) are provided and  
1108 ranges in parentheses correspond to 95% CI. Points are mean and error bars reflect 95% CI (n=3  
1109 independent experiments). C-D) L167W-293C-NBD responses. %apo is scaled such that the  
1110 fluorescence intensity (at  $\lambda_{max}$ ) for apo arrestin is 100% and each condition is scaled as a factor  
1111 of apo. Points represent values (n=1 independent experiments). E-F) A12C-V387C-AF488-  
1112 AT647N responses. %FRET is scaled such that apo arrestin is 100% and the highest  
1113 concentration of V2Rpp (100  $\mu$ M) is 0%. INF denotes infinite upper bound. ND denotes not  
1114 determined values. Range of EC50 values is indicated in parentheses and represents 95% CI.  
1115 Points represent mean and error bars reflect 95% CI (n=3 independent experiments).  
1116

1117 **References**

- 1118
- 1119 Baidya, M., Kumari, P., Dwivedi-Agnihotri, H., Pandey, S., Chaturvedi, M., Stepniewski, T.M.,  
1120 Kawakami, K., Cao, Y., Laporte, S.A., Selent, J., *et al.* (2020a). Key phosphorylation sites in  
1121 GPCRs orchestrate the contribution of beta-Arrestin 1 in ERK1/2 activation. *EMBO Rep* 21,  
1122 e49886.
- 1123 Baidya, M., Kumari, P., Dwivedi-Agnihotri, H., Pandey, S., Sokrat, B., Sposini, S., Chaturvedi, M.,  
1124 Srivastava, A., Roy, D., Hanyaloglu, A.C., *et al.* (2020b). Genetically encoded intrabody sensors  
1125 report the interaction and trafficking of beta-arrestin 1 upon activation of G-protein-coupled  
1126 receptors. *J Biol Chem* 295, 10153-10167.
- 1127 Beyett, T.S., Fraley, A.E., Labudde, E., Patra, D., Coleman, R.C., Eguchi, A., Glukhova, A., Chen,  
1128 Q., Williams, R.M., Koch, W.J., *et al.* (2019). Perturbation of the interactions of calmodulin with  
1129 GRK5 using a natural product chemical probe. *Proc Natl Acad Sci U S A* 116, 15895-15900.
- 1130 Cahill, T.J., 3rd, Thomsen, A.R., Tarrasch, J.T., Plouffe, B., Nguyen, A.H., Yang, F., Huang, L.Y.,  
1131 Kahsai, A.W., Bassoni, D.L., Gavino, B.J., *et al.* (2017). Distinct conformations of GPCR-beta-  
1132 arrestin complexes mediate desensitization, signaling, and endocytosis. *Proc Natl Acad Sci U S*  
1133 *A* 114, 2562-2567.
- 1134 Chen, Q., Perry, N.A., Vishnivetskiy, S.A., Berndt, S., Gilbert, N.C., Zhuo, Y., Singh, P.K., Tholen,  
1135 J., Ohi, M.D., Gurevich, E.V., *et al.* (2017). Structural basis of arrestin-3 activation and signaling.  
1136 *Nat Commun* 8, 1427.
- 1137 Chen, Q., Zhuo, Y., Sharma, P., Perez, I., Francis, D.J., Chakravarthy, S., Vishnivetskiy, S.A.,  
1138 Berndt, S., Hanson, S.M., Zhan, X., *et al.* (2021). An Eight Amino Acid Segment Controls  
1139 Oligomerization and Preferred Conformation of the two Non-visual Arrestins. *J Mol Biol* 433,  
1140 166790.
- 1141 De Matteis, M.A., and Godi, A. (2004). PI-3-kinase membrane traffic. *Nat Cell Biol* 6, 487-492.
- 1142 DeFea, K.A., Zalevsky, J., Thoma, M.S., Dery, O., Mullins, R.D., and Bunnett, N.W. (2000). beta-  
1143 arrestin-dependent endocytosis of proteinase-activated receptor 2 is required for intracellular  
1144 targeting of activated ERK1/2. *J Cell Biol* 148, 1267-1281.
- 1145 Dery, O., Thoma, M.S., Wong, H., Grady, E.F., and Bunnett, N.W. (1999). Trafficking of  
1146 proteinase-activated receptor-2 and beta-arrestin-1 tagged with green fluorescent protein. beta-  
1147 Arrestin-dependent endocytosis of a proteinase receptor. *J Biol Chem* 274, 18524-18535.
- 1148 Di Paolo, G., and De Camilli, P. (2006). Phosphoinositides in cell regulation and membrane  
1149 dynamics. *Nature* 443, 651-657.
- 1150 Dixon, A.S., Schwinn, M.K., Hall, M.P., Zimmerman, K., Otto, P., Lubben, T.H., Butler, B.L.,  
1151 Binkowski, B.F., Machleidt, T., Kirkland, T.A., *et al.* (2016). NanoLuc Complementation Reporter  
1152 Optimized for Accurate Measurement of Protein Interactions in Cells. *ACS Chem Biol* 11, 400-  
1153 408.
- 1154 Eichel, K., Jullie, D., Barsi-Rhyne, B., Latorraca, N.R., Masureel, M., Sibarita, J.B., Dror, R.O.,  
1155 and von Zastrow, M. (2018). Catalytic activation of beta-arrestin by GPCRs. *Nature* 557, 381-386.



- 1156 Eichel, K., Jullie, D., and von Zastrow, M. (2016). beta-Arrestin drives MAP kinase signalling from  
1157 clathrin-coated structures after GPCR dissociation. *Nat Cell Biol* 18, 303-310.
- 1158 Feinstein, T.N., Wehbi, V.L., Ardura, J.A., Wheeler, D.S., Ferrandon, S., Gardella, T.J., and  
1159 Vilardaga, J.P. (2011). Retromer terminates the generation of cAMP by internalized PTH  
1160 receptors. *Nat Chem Biol* 7, 278-284.
- 1161 Feinstein, T.N., Yui, N., Webber, M.J., Wehbi, V.L., Stevenson, H.P., King, J.D., Jr., Hallows,  
1162 K.R., Brown, D., Bouley, R., and Vilardaga, J.P. (2013). Noncanonical control of vasopressin  
1163 receptor type 2 signaling by retromer and arrestin. *J Biol Chem* 288, 27849-27860.
- 1164 Ferrandon, S., Feinstein, T.N., Castro, M., Wang, B., Bouley, R., Potts, J.T., Gardella, T.J., and  
1165 Vilardaga, J.P. (2009). Sustained cyclic AMP production by parathyroid hormone receptor  
1166 endocytosis. *Nat Chem Biol* 5, 734-742.
- 1167 Gaidarov, I., Krupnick, J.G., Falck, J.R., Benovic, J.L., and Keen, J.H. (1999). Arrestin function in  
1168 G protein-coupled receptor endocytosis requires phosphoinositide binding. *EMBO J* 18, 871-881.
- 1169 Ghosh, E., Dwivedi, H., Baidya, M., Srivastava, A., Kumari, P., Stepniewski, T., Kim, H.R., Lee,  
1170 M.H., van Gastel, J., Chaturvedi, M., *et al.* (2019). Conformational Sensors and Domain Swapping  
1171 Reveal Structural and Functional Differences between beta-Arrestin Isoforms. *Cell Rep* 28, 3287-  
1172 3299 e3286.
- 1173 Grundmann, M., Merten, N., Malfacini, D., Inoue, A., Preis, P., Simon, K., Ruttiger, N., Ziegler, N.,  
1174 Benkel, T., Schmitt, N.K., *et al.* (2018). Lack of beta-arrestin signaling in the absence of active G  
1175 proteins. *Nat Commun* 9, 341.
- 1176 Hanyaloglu, A.C., and von Zastrow, M. (2008). Regulation of GPCRs by endocytic membrane  
1177 trafficking and its potential implications. *Annu Rev Pharmacol Toxicol* 48, 537-568.
- 1178 Huang, W., Masureel, M., Qu, Q., Janetzko, J., Inoue, A., Kato, H.E., Robertson, M.J., Nguyen,  
1179 K.C., Glenn, J.S., Skiniotis, G., *et al.* (2020). Structure of the neurotensin receptor 1 in complex  
1180 with beta-arrestin 1. *Nature* 579, 303-308.
- 1181 Innamorati, G., Sadeghi, H., and Birnbaumer, M. (1998a). Transient phosphorylation of the V1a  
1182 vasopressin receptor. *J Biol Chem* 273, 7155-7161.
- 1183 Innamorati, G., Sadeghi, H.M., Tran, N.T., and Birnbaumer, M. (1998b). A serine cluster prevents  
1184 recycling of the V2 vasopressin receptor. *Proc Natl Acad Sci U S A* 95, 2222-2226.
- 1185 Inoue, A., Raimondi, F., Kadji, F.M.N., Singh, G., Kishi, T., Uwamizu, A., Ono, Y., Shinjo, Y.,  
1186 Ishida, S., Arang, N., *et al.* (2019). Illuminating G-Protein-Coupling Selectivity of GPCRs. *Cell*  
1187 177, 1933-1947 e1925.
- 1188 Irannejad, R., Tomshine, J.C., Tomshine, J.R., Chevalier, M., Mahoney, J.P., Steyaert, J.,  
1189 Rasmussen, S.G., Sunahara, R.K., El-Samad, H., Huang, B., *et al.* (2013). Conformational  
1190 biosensors reveal GPCR signalling from endosomes. *Nature* 495, 534-538.
- 1191 Irannejad, R., Tsvetanova, N.G., Lobingier, B.T., and von Zastrow, M. (2015). Effects of  
1192 endocytosis on receptor-mediated signaling. *Curr Opin Cell Biol* 35, 137-143.

- 1193 Kadlecova, Z., Spielman, S.J., Loerke, D., Mohanakrishnan, A., Reed, D.K., and Schmid, S.L.  
1194 (2017). Regulation of clathrin-mediated endocytosis by hierarchical allosteric activation of AP2. *J*  
1195 *Cell Biol* 216, 167-179.
- 1196 Khoury, E., Nikolajev, L., Simaan, M., Namkung, Y., and Laporte, S.A. (2014). Differential  
1197 regulation of endosomal GPCR/beta-arrestin complexes and trafficking by MAPK. *J Biol Chem*  
1198 289, 23302-23317.
- 1199 Kim, M., Vishnivetskiy, S.A., Van Eps, N., Alexander, N.S., Cleghorn, W.M., Zhan, X., Hanson,  
1200 S.M., Morizumi, T., Ernst, O.P., Meiler, J., *et al.* (2012). Conformation of receptor-bound visual  
1201 arrestin. *Proc Natl Acad Sci U S A* 109, 18407-18412.
- 1202 Kim, Y.J., Hofmann, K.P., Ernst, O.P., Scheerer, P., Choe, H.W., and Sommer, M.E. (2013).  
1203 Crystal structure of pre-activated arrestin p44. *Nature* 497, 142-146.
- 1204 Komolov, K.E., and Benovic, J.L. (2018). G protein-coupled receptor kinases: Past, present and  
1205 future. *Cell Signal* 41, 17-24.
- 1206 Krueger, K.M., Daaka, Y., Pitcher, J.A., and Lefkowitz, R.J. (1997). The role of sequestration in  
1207 G protein-coupled receptor resensitization. Regulation of beta2-adrenergic receptor  
1208 dephosphorylation by vesicular acidification. *J Biol Chem* 272, 5-8.
- 1209 Kumari, P., Srivastava, A., Banerjee, R., Ghosh, E., Gupta, P., Ranjan, R., Chen, X., Gupta, B.,  
1210 Gupta, C., Jaiman, D., *et al.* (2016). Functional competence of a partially engaged GPCR-beta-  
1211 arrestin complex. *Nat Commun* 7, 13416.
- 1212 Latorraca, N.R., Masureel, M., Hollingsworth, S.A., Heydenreich, F.M., Suomivuori, C.M., Brinton,  
1213 C., Townshend, R.J.L., Bouvier, M., Kobilka, B.K., and Dror, R.O. (2020). How GPCR  
1214 Phosphorylation Patterns Orchestrate Arrestin-Mediated Signaling. *Cell* 183, 1813-1825 e1818.
- 1215 Lee, Y., Warne, T., Nehme, R., Pandey, S., Dwivedi-Agnihotri, H., Chaturvedi, M., Edwards, P.C.,  
1216 Garcia-Nafria, J., Leslie, A.G.W., Shukla, A.K., *et al.* (2020). Molecular basis of beta-arrestin  
1217 coupling to formoterol-bound beta1-adrenoceptor. *Nature* 583, 862-866.
- 1218 Lobingier, B.T., and von Zastrow, M. (2019). When trafficking and signaling mix: How subcellular  
1219 location shapes G protein-coupled receptor activation of heterotrimeric G proteins. *Traffic* 20, 130-  
1220 136.
- 1221 Luttrell, L.M., Wang, J., Plouffe, B., Smith, J.S., Yamani, L., Kaur, S., Jean-Charles, P.Y.,  
1222 Gauthier, C., Lee, M.H., Pani, B., *et al.* (2018). Manifold roles of beta-arrestins in GPCR signaling  
1223 elucidated with siRNA and CRISPR/Cas9. *Sci Signal* 11.
- 1224 Martinez-Morales, J.C., Romero-Avila, M.T., Reyes-Cruz, G., and Garcia-Sainz, J.A. (2018).  
1225 S1P1 receptor phosphorylation, internalization, and interaction with Rab proteins: effects of  
1226 sphingosine 1-phosphate, FTY720-P, phorbol esters, and paroxetine. *Biosci Rep* 38.
- 1227 Milano, S.K., Kim, Y.M., Stefano, F.P., Benovic, J.L., and Brenner, C. (2006). Nonvisual arrestin  
1228 oligomerization and cellular localization are regulated by inositol hexakisphosphate binding. *J Biol*  
1229 *Chem* 281, 9812-9823.

- 1230 Nakagawa, T., and Asahi, M. (2013). beta1-adrenergic receptor recycles via a membranous  
1231 organelle, recycling endosome, by binding with sorting nexin27. *J Membr Biol* 246, 571-579.
- 1232 Nguyen, A.H., Thomsen, A.R.B., Cahill, T.J., 3rd, Huang, R., Huang, L.Y., Marcink, T., Clarke,  
1233 O.B., Heissel, S., Masoudi, A., Ben-Hail, D., *et al.* (2019). Structure of an endosomal signaling  
1234 GPCR-G protein-beta-arrestin megacomplex. *Nat Struct Mol Biol* 26, 1123-1131.
- 1235 O'Hayre, M., Eichel, K., Avino, S., Zhao, X., Steffen, D.J., Feng, X., Kawakami, K., Aoki, J.,  
1236 Messer, K., Sunahara, R., *et al.* (2017). Genetic evidence that beta-arrestins are dispensable for  
1237 the initiation of beta2-adrenergic receptor signaling to ERK. *Sci Signal* 10.
- 1238 Oakley, R.H., Laporte, S.A., Holt, J.A., Barak, L.S., and Caron, M.G. (1999). Association of beta-  
1239 arrestin with G protein-coupled receptors during clathrin-mediated endocytosis dictates the profile  
1240 of receptor resensitization. *J Biol Chem* 274, 32248-32257.
- 1241 Oakley, R.H., Laporte, S.A., Holt, J.A., Barak, L.S., and Caron, M.G. (2001). Molecular  
1242 determinants underlying the formation of stable intracellular G protein-coupled receptor-beta-  
1243 arrestin complexes after receptor endocytosis\*. *J Biol Chem* 276, 19452-19460.
- 1244 Oakley, R.H., Laporte, S.A., Holt, J.A., Caron, M.G., and Barak, L.S. (2000). Differential affinities  
1245 of visual arrestin, beta arrestin1, and beta arrestin2 for G protein-coupled receptors delineate two  
1246 major classes of receptors. *J Biol Chem* 275, 17201-17210.
- 1247 Perkovska, S., Mejean, C., Ayoub, M.A., Li, J., Hemery, F., Corbani, M., Laguette, N., Ventura,  
1248 M.A., Orcel, H., Durroux, T., *et al.* (2018). V1b vasopressin receptor trafficking and signaling: Role  
1249 of arrestins, G proteins and Src kinase. *Traffic* 19, 58-82.
- 1250 Rajagopal, S., and Shenoy, S.K. (2018). GPCR desensitization: Acute and prolonged phases.  
1251 *Cell Signal* 41, 9-16.
- 1252 Ranjan, R., Dwivedi, H., Baidya, M., Kumar, M., and Shukla, A.K. (2017). Novel Structural Insights  
1253 into GPCR-beta-Arrestin Interaction and Signaling. *Trends Cell Biol* 27, 851-862.
- 1254 Reiter, E., Ahn, S., Shukla, A.K., and Lefkowitz, R.J. (2012). Molecular mechanism of beta-  
1255 arrestin-biased agonism at seven-transmembrane receptors. *Annu Rev Pharmacol Toxicol* 52,  
1256 179-197.
- 1257 Sente, A., Peer, R., Srivastava, A., Baidya, M., Lesk, A.M., Balaji, S., Shukla, A.K., Babu, M.M.,  
1258 and Flock, T. (2018). Molecular mechanism of modulating arrestin conformation by GPCR  
1259 phosphorylation. *Nat Struct Mol Biol* 25, 538-545.
- 1260 Shukla, A.K., Manglik, A., Kruse, A.C., Xiao, K., Reis, R.I., Tseng, W.C., Staus, D.P., Hilger, D.,  
1261 Uysal, S., Huang, L.Y., *et al.* (2013). Structure of active beta-arrestin-1 bound to a G-protein-  
1262 coupled receptor phosphopeptide. *Nature* 497, 137-141.
- 1263 Shukla, A.K., Westfield, G.H., Xiao, K., Reis, R.I., Huang, L.Y., Tripathi-Shukla, P., Qian, J., Li,  
1264 S., Blanc, A., Oleskie, A.N., *et al.* (2014). Visualization of arrestin recruitment by a G-protein-  
1265 coupled receptor. *Nature* 512, 218-222.
- 1266 Sommer, M.E., Smith, W.C., and Farrens, D.L. (2005). Dynamics of arrestin-rhodopsin  
1267 interactions: arrestin and retinal release are directly linked events. *J Biol Chem* 280, 6861-6871.

- 1268 Sommer, M.E., Smith, W.C., and Farrens, D.L. (2006). Dynamics of arrestin-rhodopsin  
1269 interactions: acidic phospholipids enable binding of arrestin to purified rhodopsin in detergent. *J*  
1270 *Biol Chem* *281*, 9407-9417.
- 1271 Staus, D.P., Hu, H., Robertson, M.J., Kleinhenz, A.L.W., Wingler, L.M., Capel, W.D., Latorraca,  
1272 N.R., Lefkowitz, R.J., and Skiniotis, G. (2020). Structure of the M2 muscarinic receptor-beta-  
1273 arrestin complex in a lipid nanodisc. *Nature* *579*, 297-302.
- 1274 Sun, Y., Carroll, S., Kaksonen, M., Toshima, J.Y., and Drubin, D.G. (2007). PtdIns(4,5)P2  
1275 turnover is required for multiple stages during clathrin- and actin-dependent endocytic  
1276 internalization. *J Cell Biol* *177*, 355-367.
- 1277 Tewson, P.H., Martinka, S., Shaner, N.C., Hughes, T.E., and Quinn, A.M. (2016). New DAG and  
1278 cAMP Sensors Optimized for Live-Cell Assays in Automated Laboratories. *J Biomol Screen* *21*,  
1279 298-305.
- 1280 Thomsen, A.R.B., Plouffe, B., Cahill, T.J., 3rd, Shukla, A.K., Tarrasch, J.T., Dosey, A.M., Kahsai,  
1281 A.W., Strachan, R.T., Pani, B., Mahoney, J.P., *et al.* (2016). GPCR-G Protein-beta-Arrestin  
1282 Super-Complex Mediates Sustained G Protein Signaling. *Cell* *166*, 907-919.
- 1283 Toth, D.J., Toth, J.T., Gulyas, G., Balla, A., Balla, T., Hunyady, L., and Varnai, P. (2012). Acute  
1284 depletion of plasma membrane phosphatidylinositol 4,5-bisphosphate impairs specific steps in  
1285 endocytosis of the G-protein-coupled receptor. *J Cell Sci* *125*, 2185-2197.
- 1286 Trapaidze, N., Gomes, I., Bansinath, M., and Devi, L.A. (2000). Recycling and resensitization of  
1287 delta opioid receptors. *DNA Cell Biol* *19*, 195-204.
- 1288 Yin, W., Li, Z., Jin, M., Yin, Y.L., de Waal, P.W., Pal, K., Yin, Y., Gao, X., He, Y., Gao, J., *et al.*  
1289 (2019). A complex structure of arrestin-2 bound to a G protein-coupled receptor. *Cell Res* *29*,  
1290 971-983.
- 1291 Zhuang, T., Vishnivetskiy, S.A., Gurevich, V.V., and Sanders, C.R. (2010). Elucidation of inositol  
1292 hexaphosphate and heparin interaction sites and conformational changes in arrestin-1 by solution  
1293 nuclear magnetic resonance. *Biochemistry* *49*, 10473-10485.
- 1294 Zhuo, Y., Vishnivetskiy, S.A., Zhan, X., Gurevich, V.V., and Klug, C.S. (2014). Identification of  
1295 receptor binding-induced conformational changes in non-visual arrestins. *J Biol Chem* *289*,  
1296 20991-21002.  
1297



# Figure 1

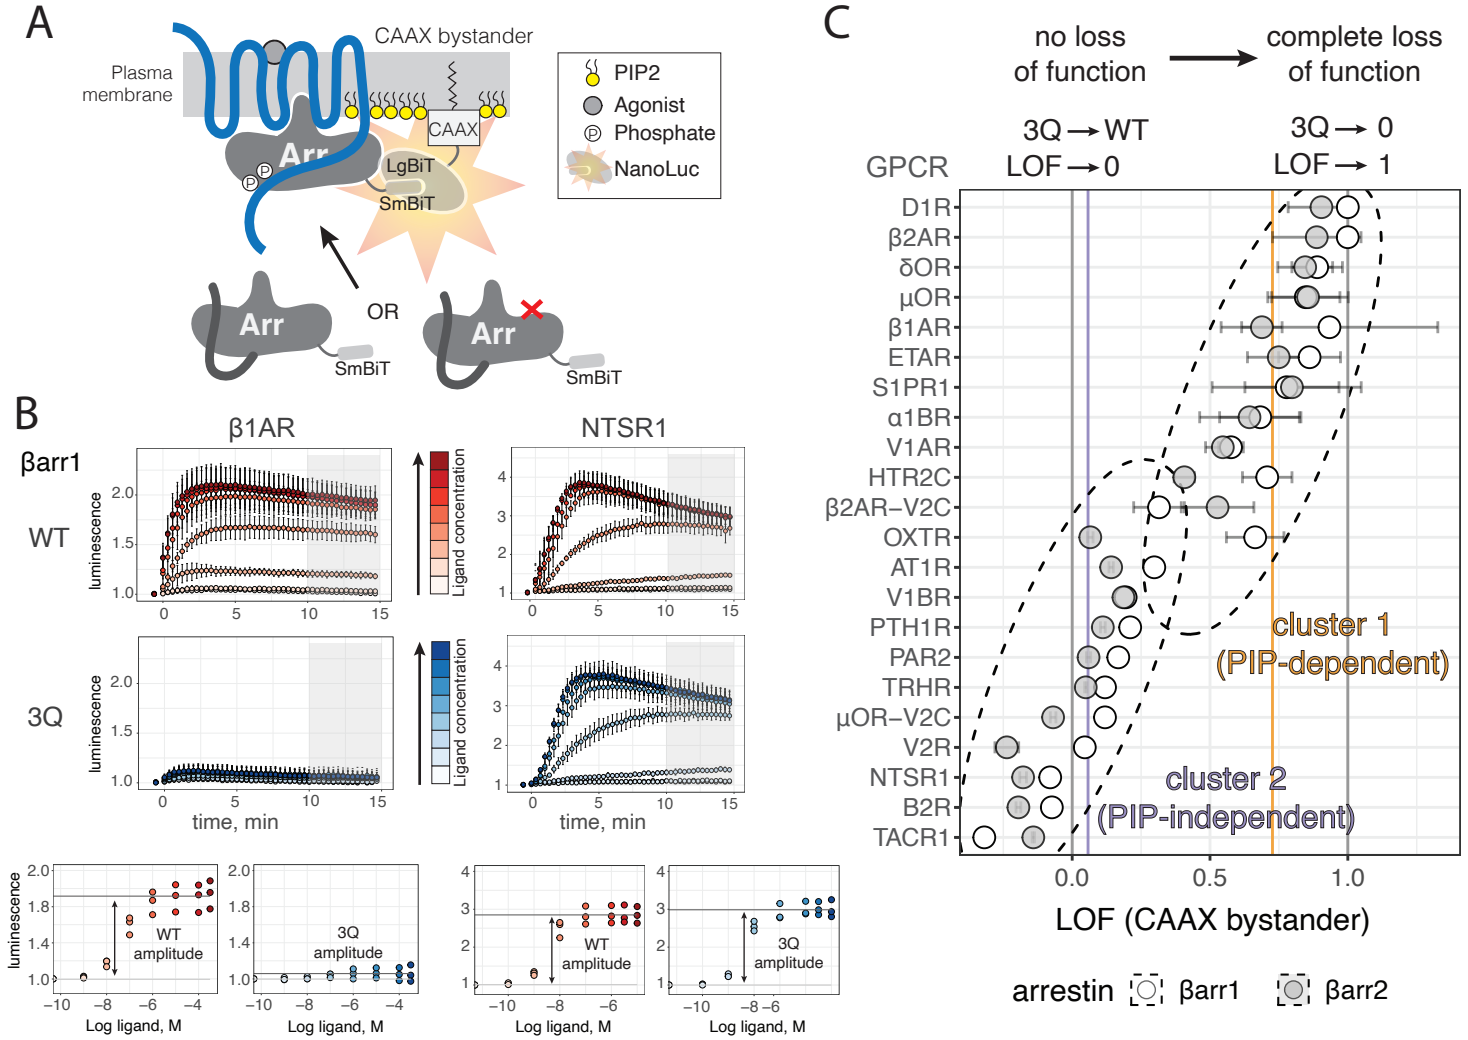

## Figure 2

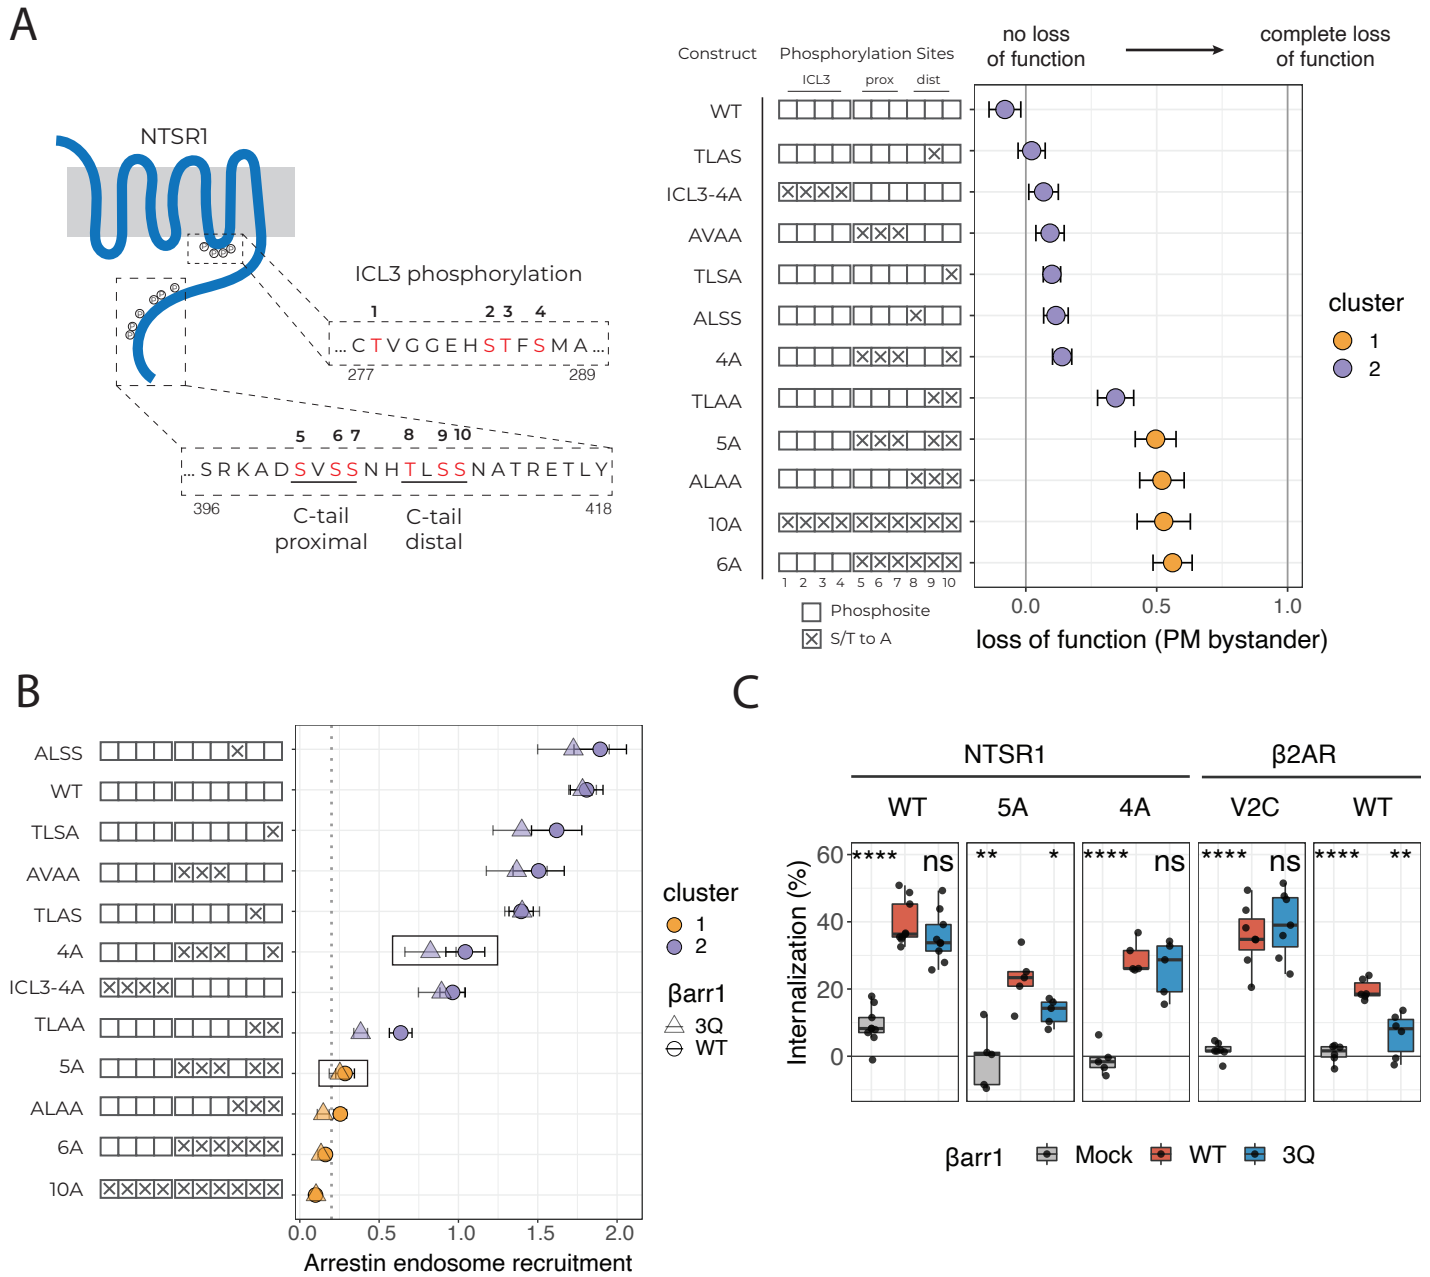

## Figure 3

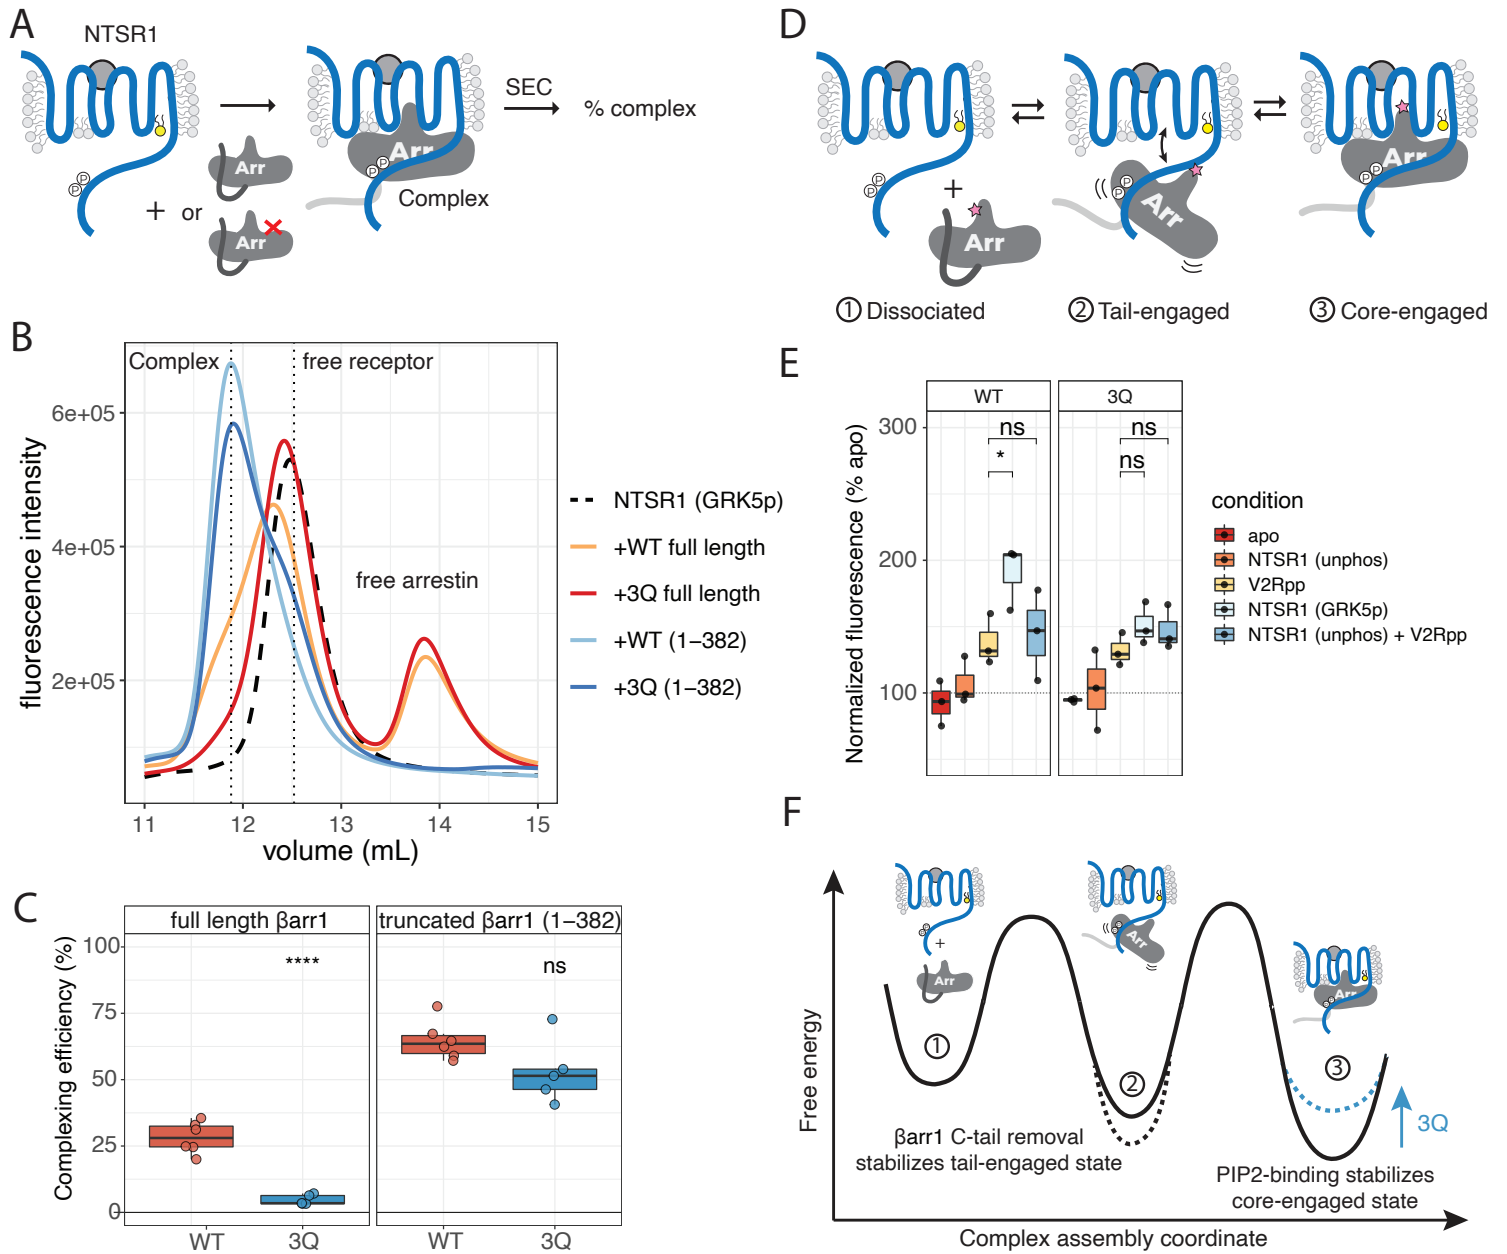

## Figure 4

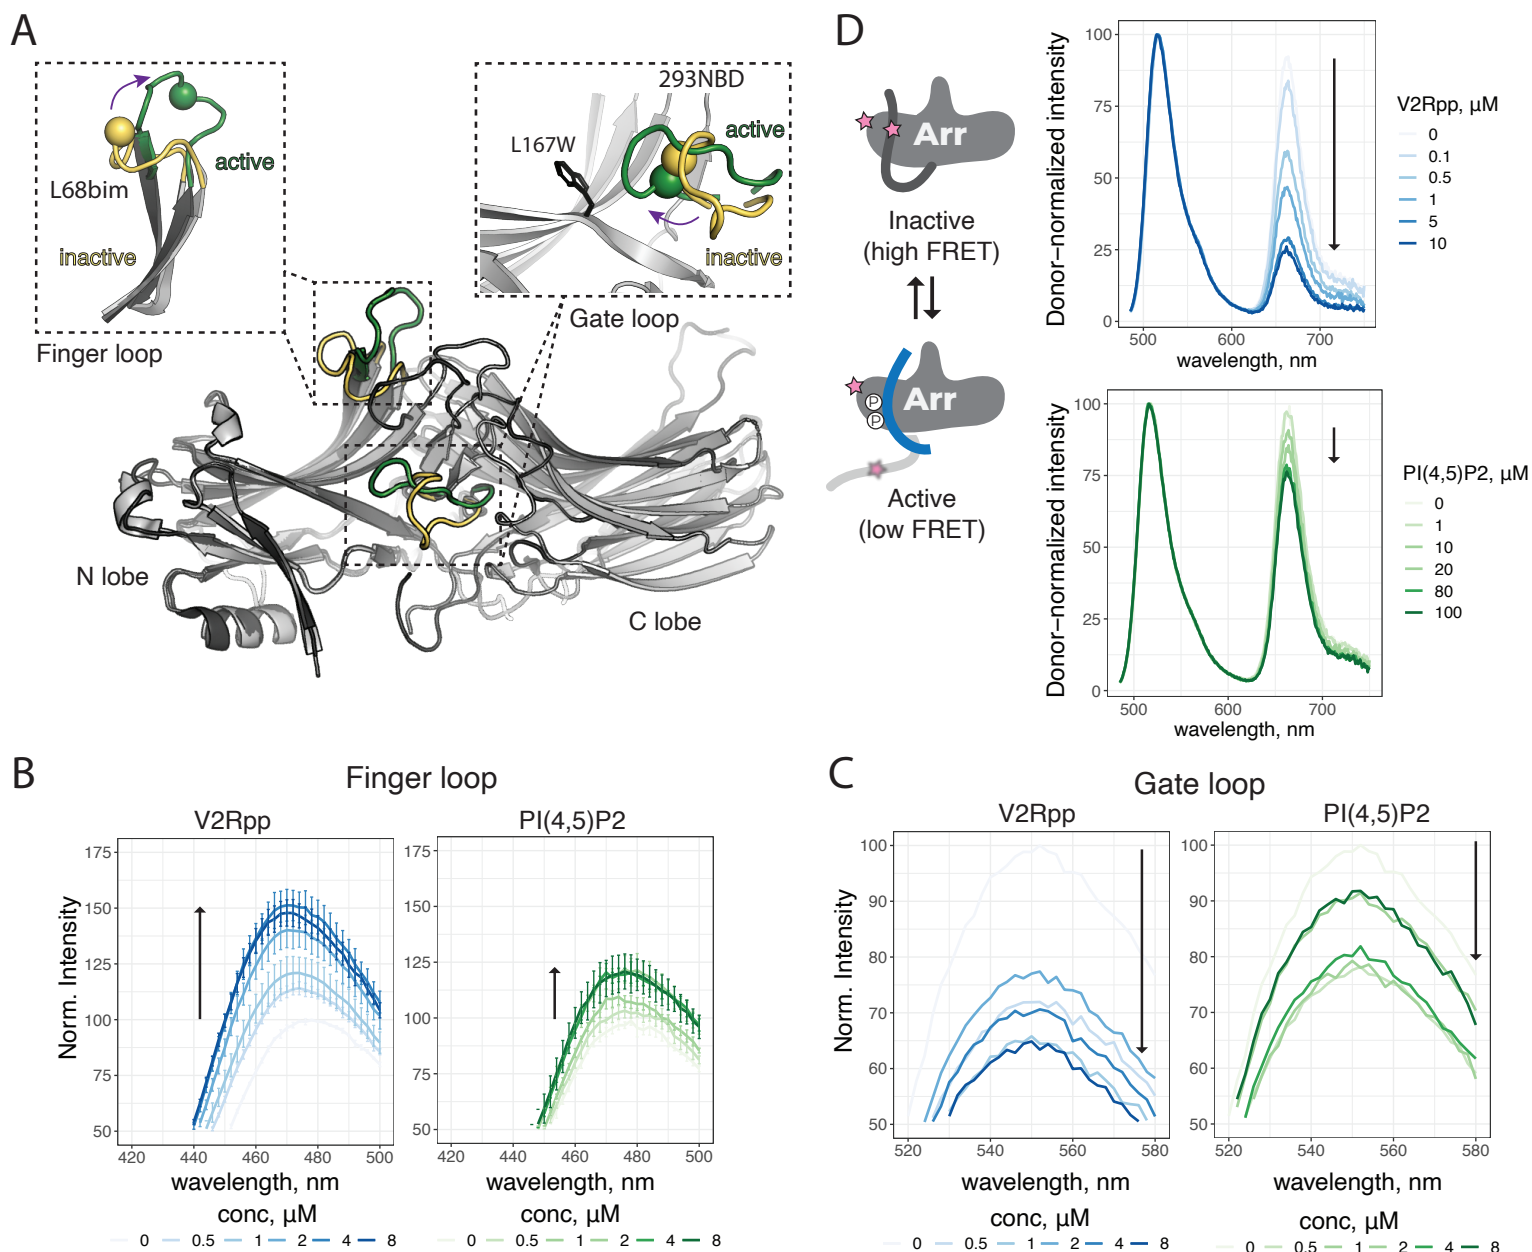



Figure 5

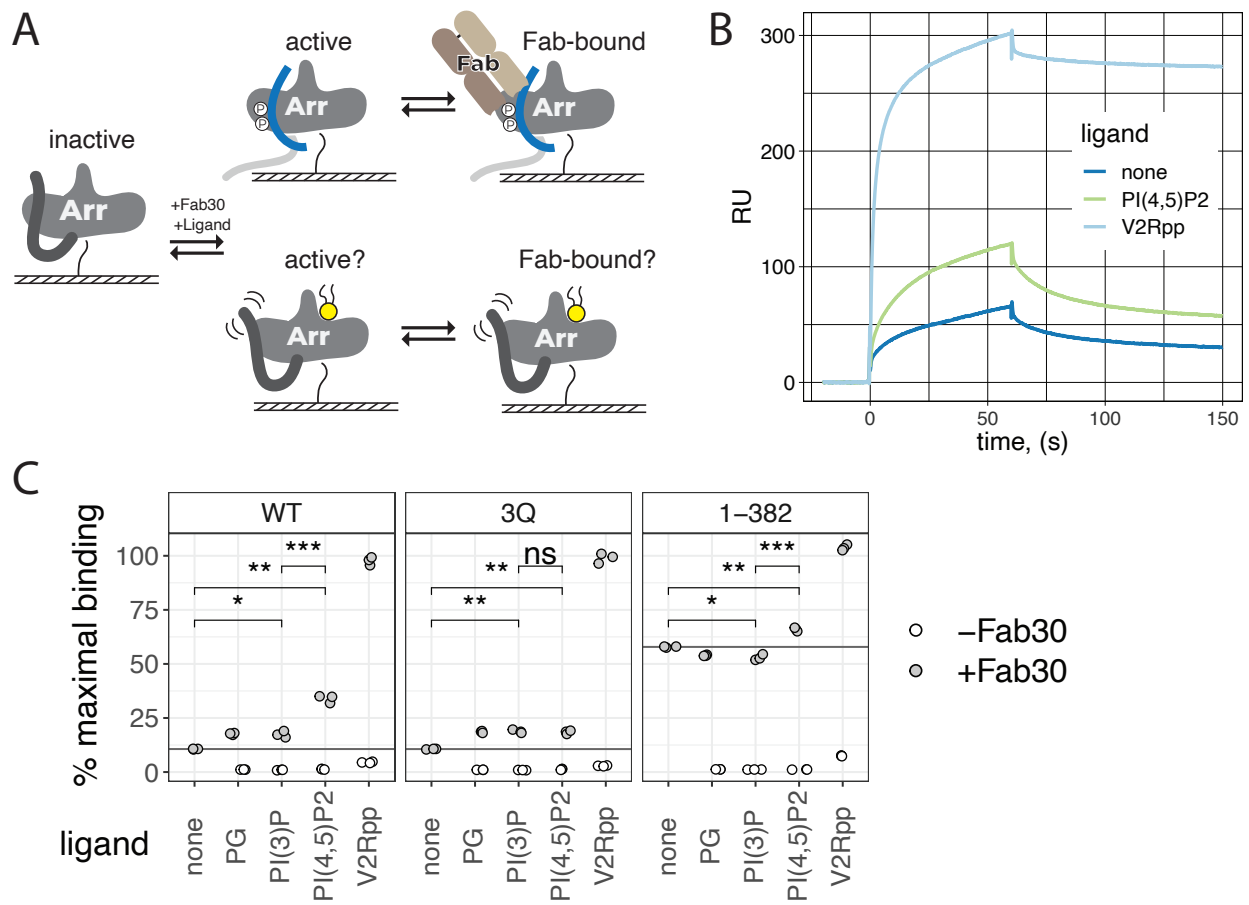

Figure 6

**Class A: PIP-dependent GPCR**

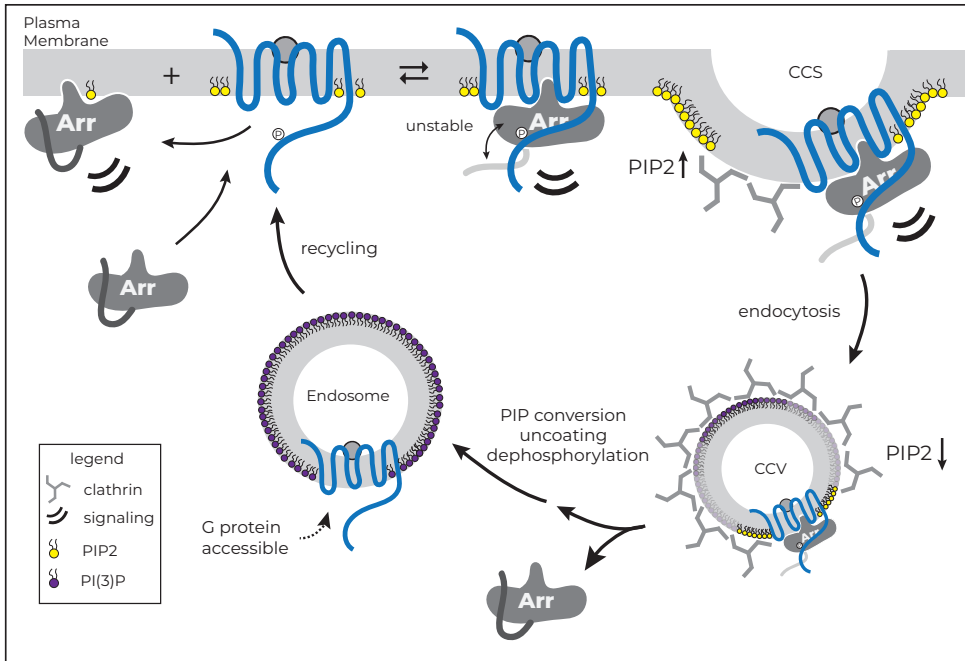

**Class B: PIP-independent GPCR**

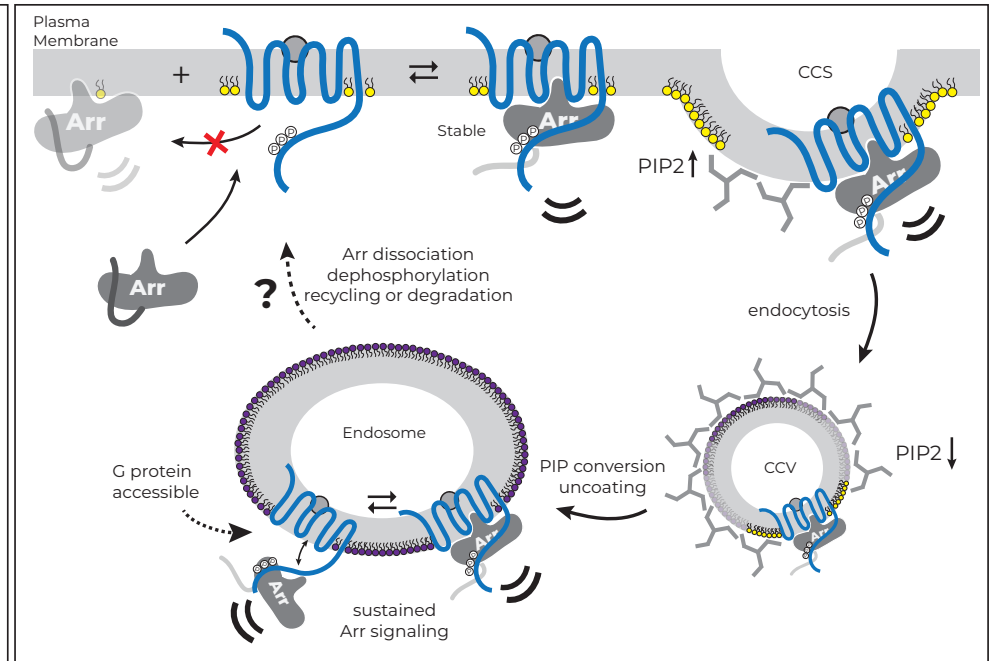

# Supplementary Figure

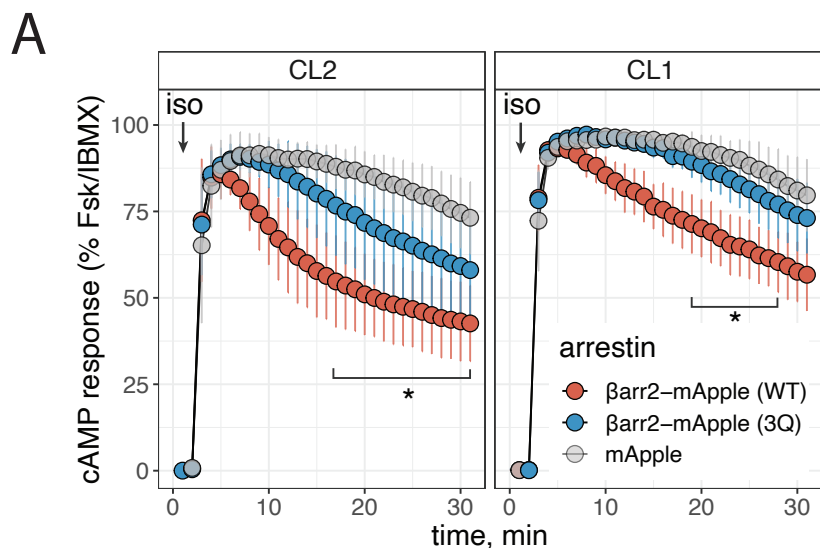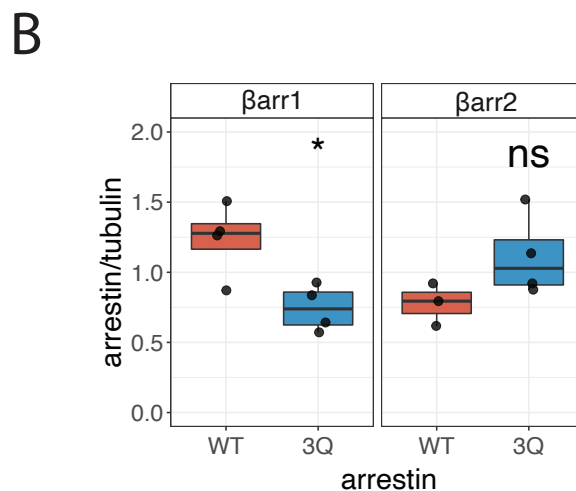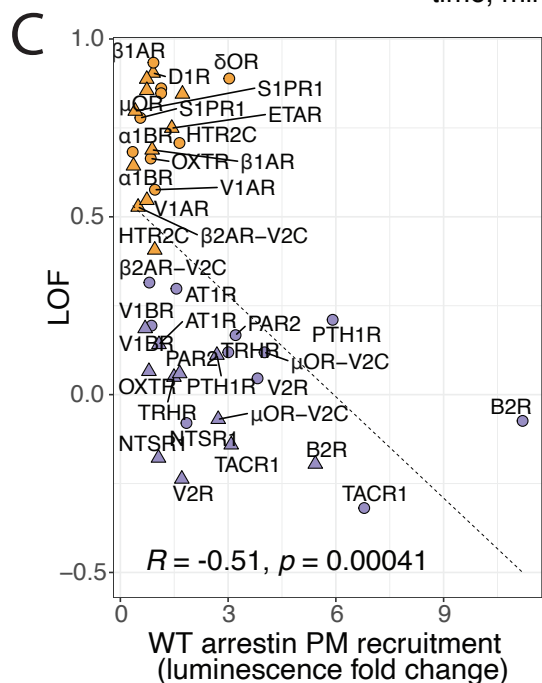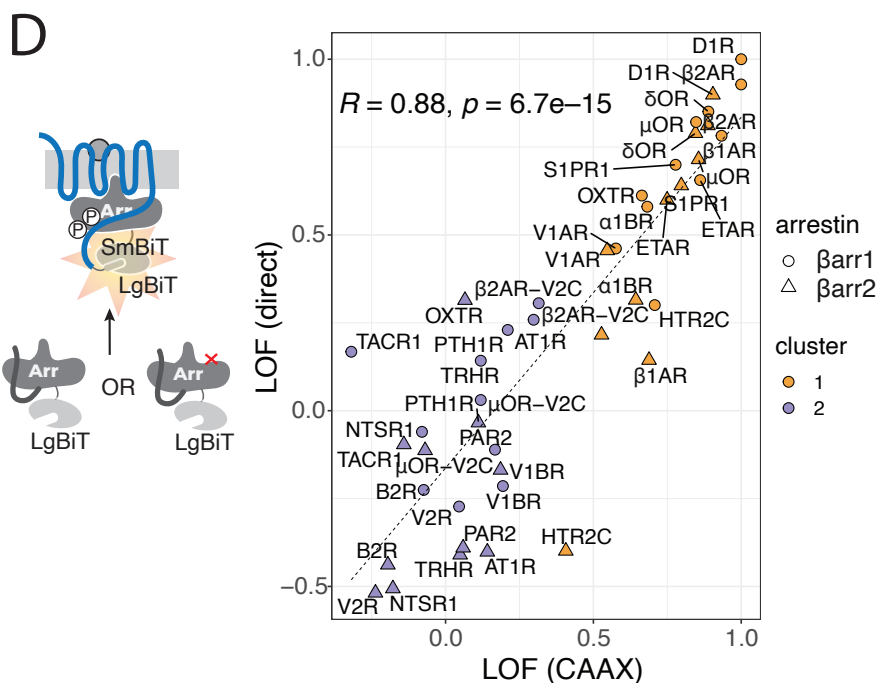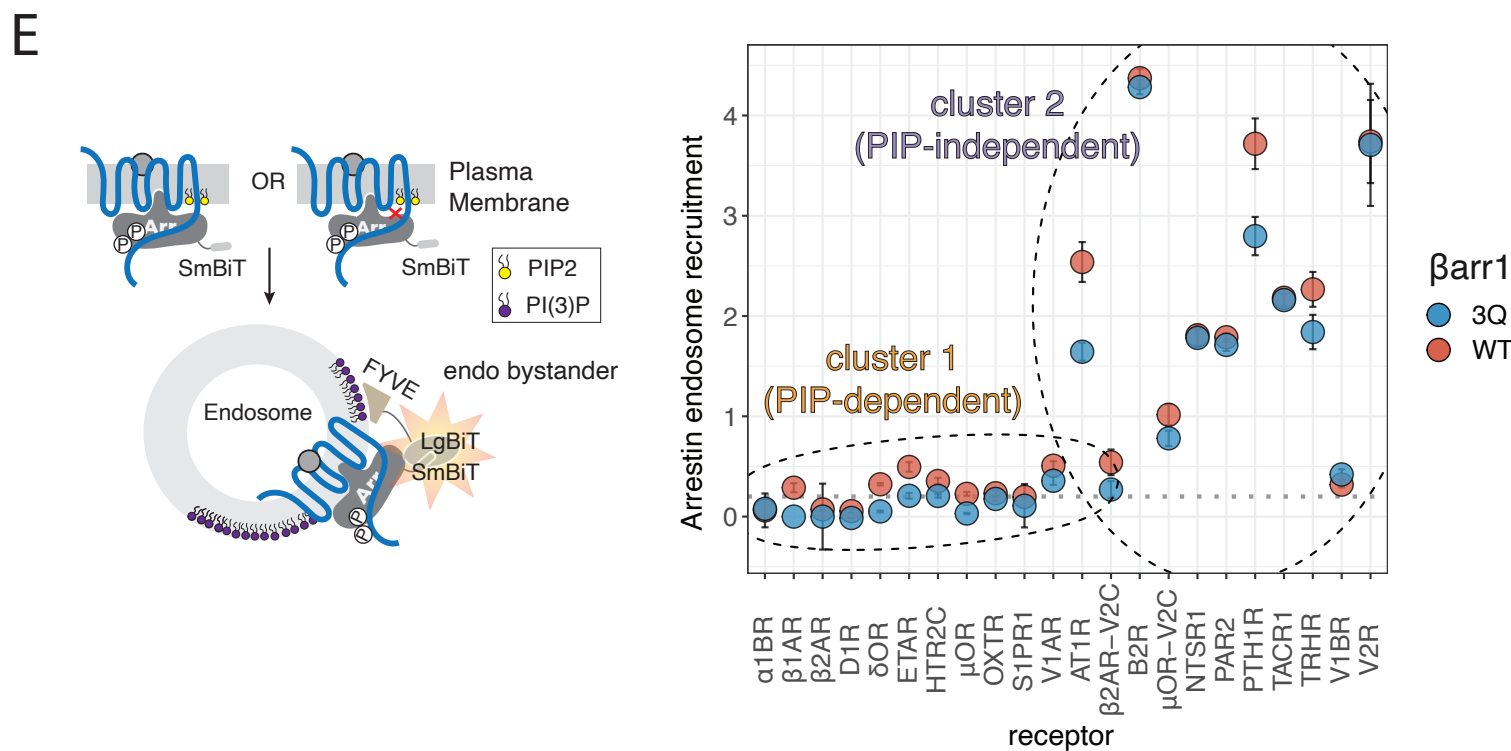

## Supplementary Figure 3

A

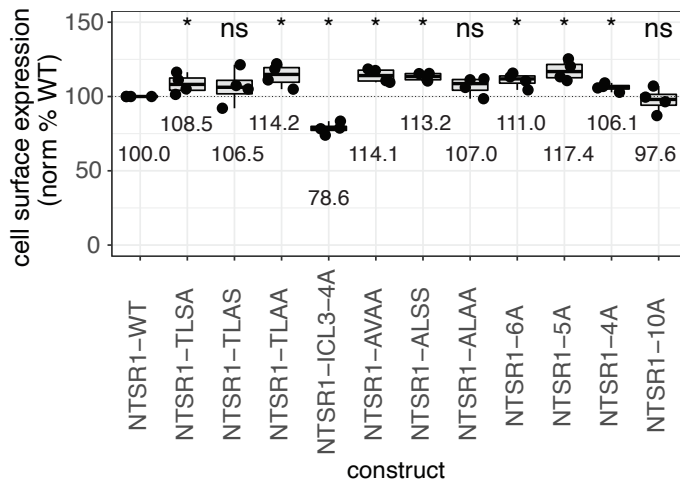

B

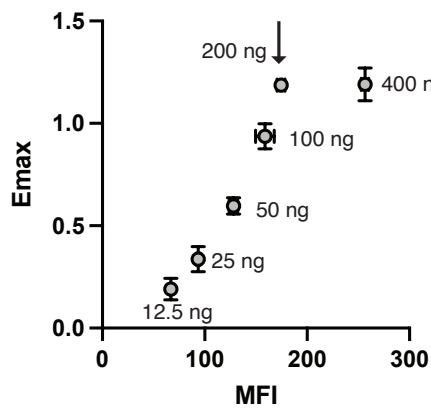

C

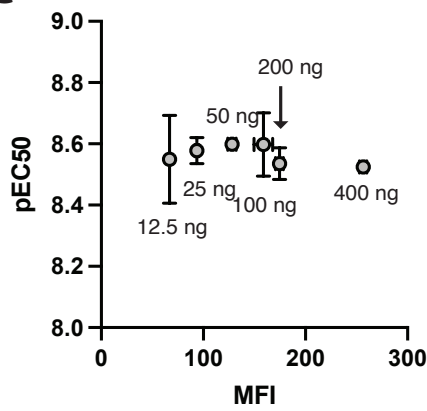





## Supplementary Figure 4

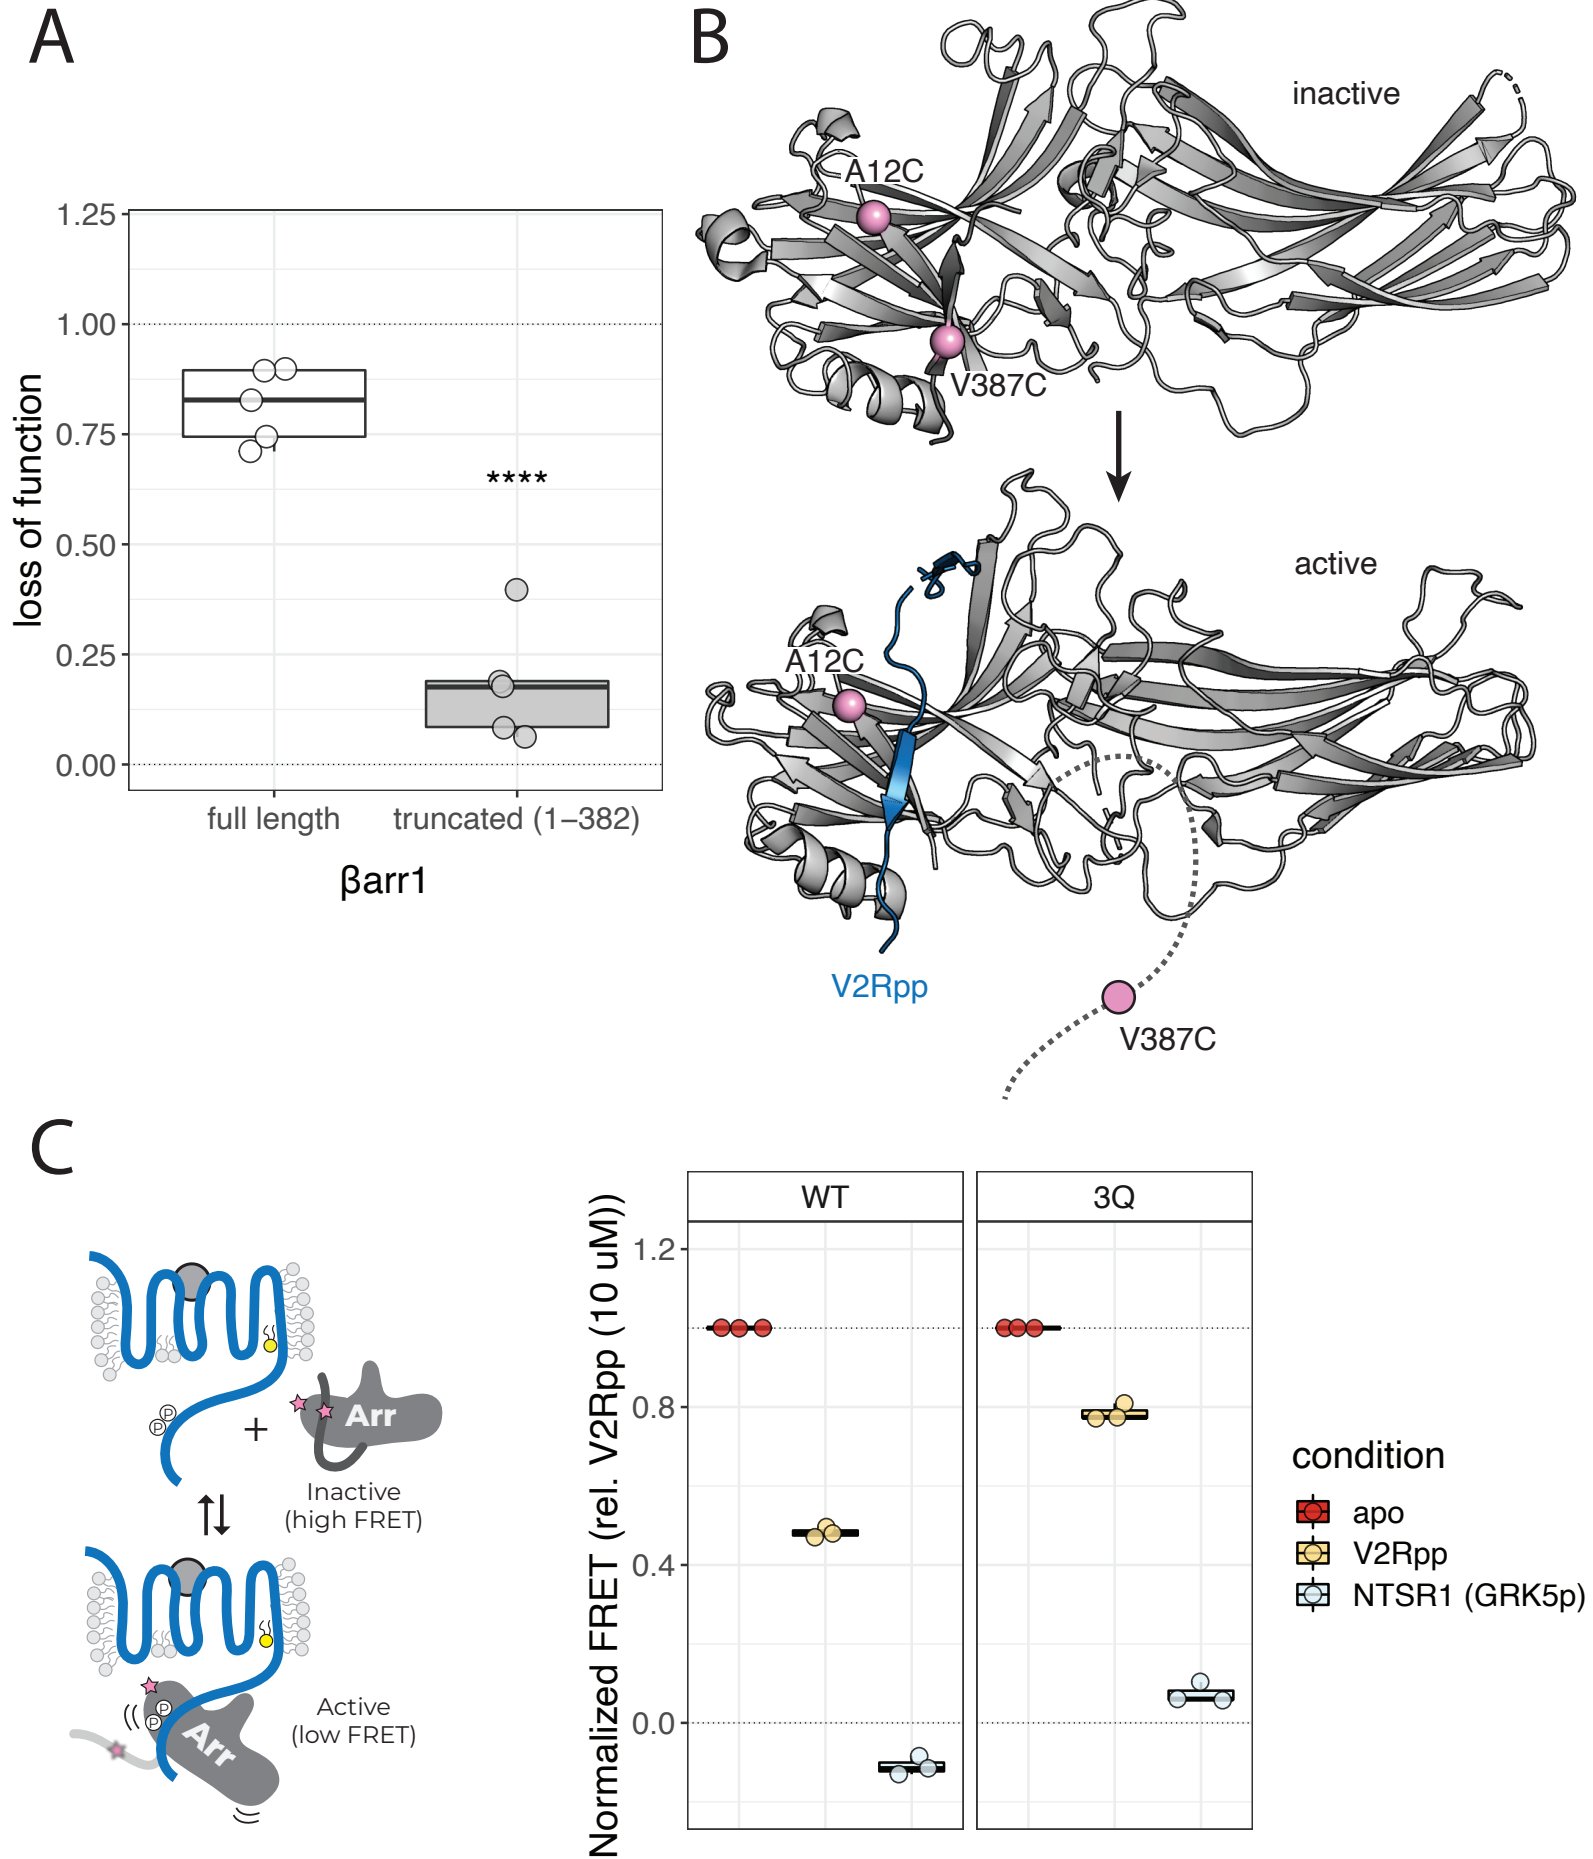

# Supplementary Figure 5

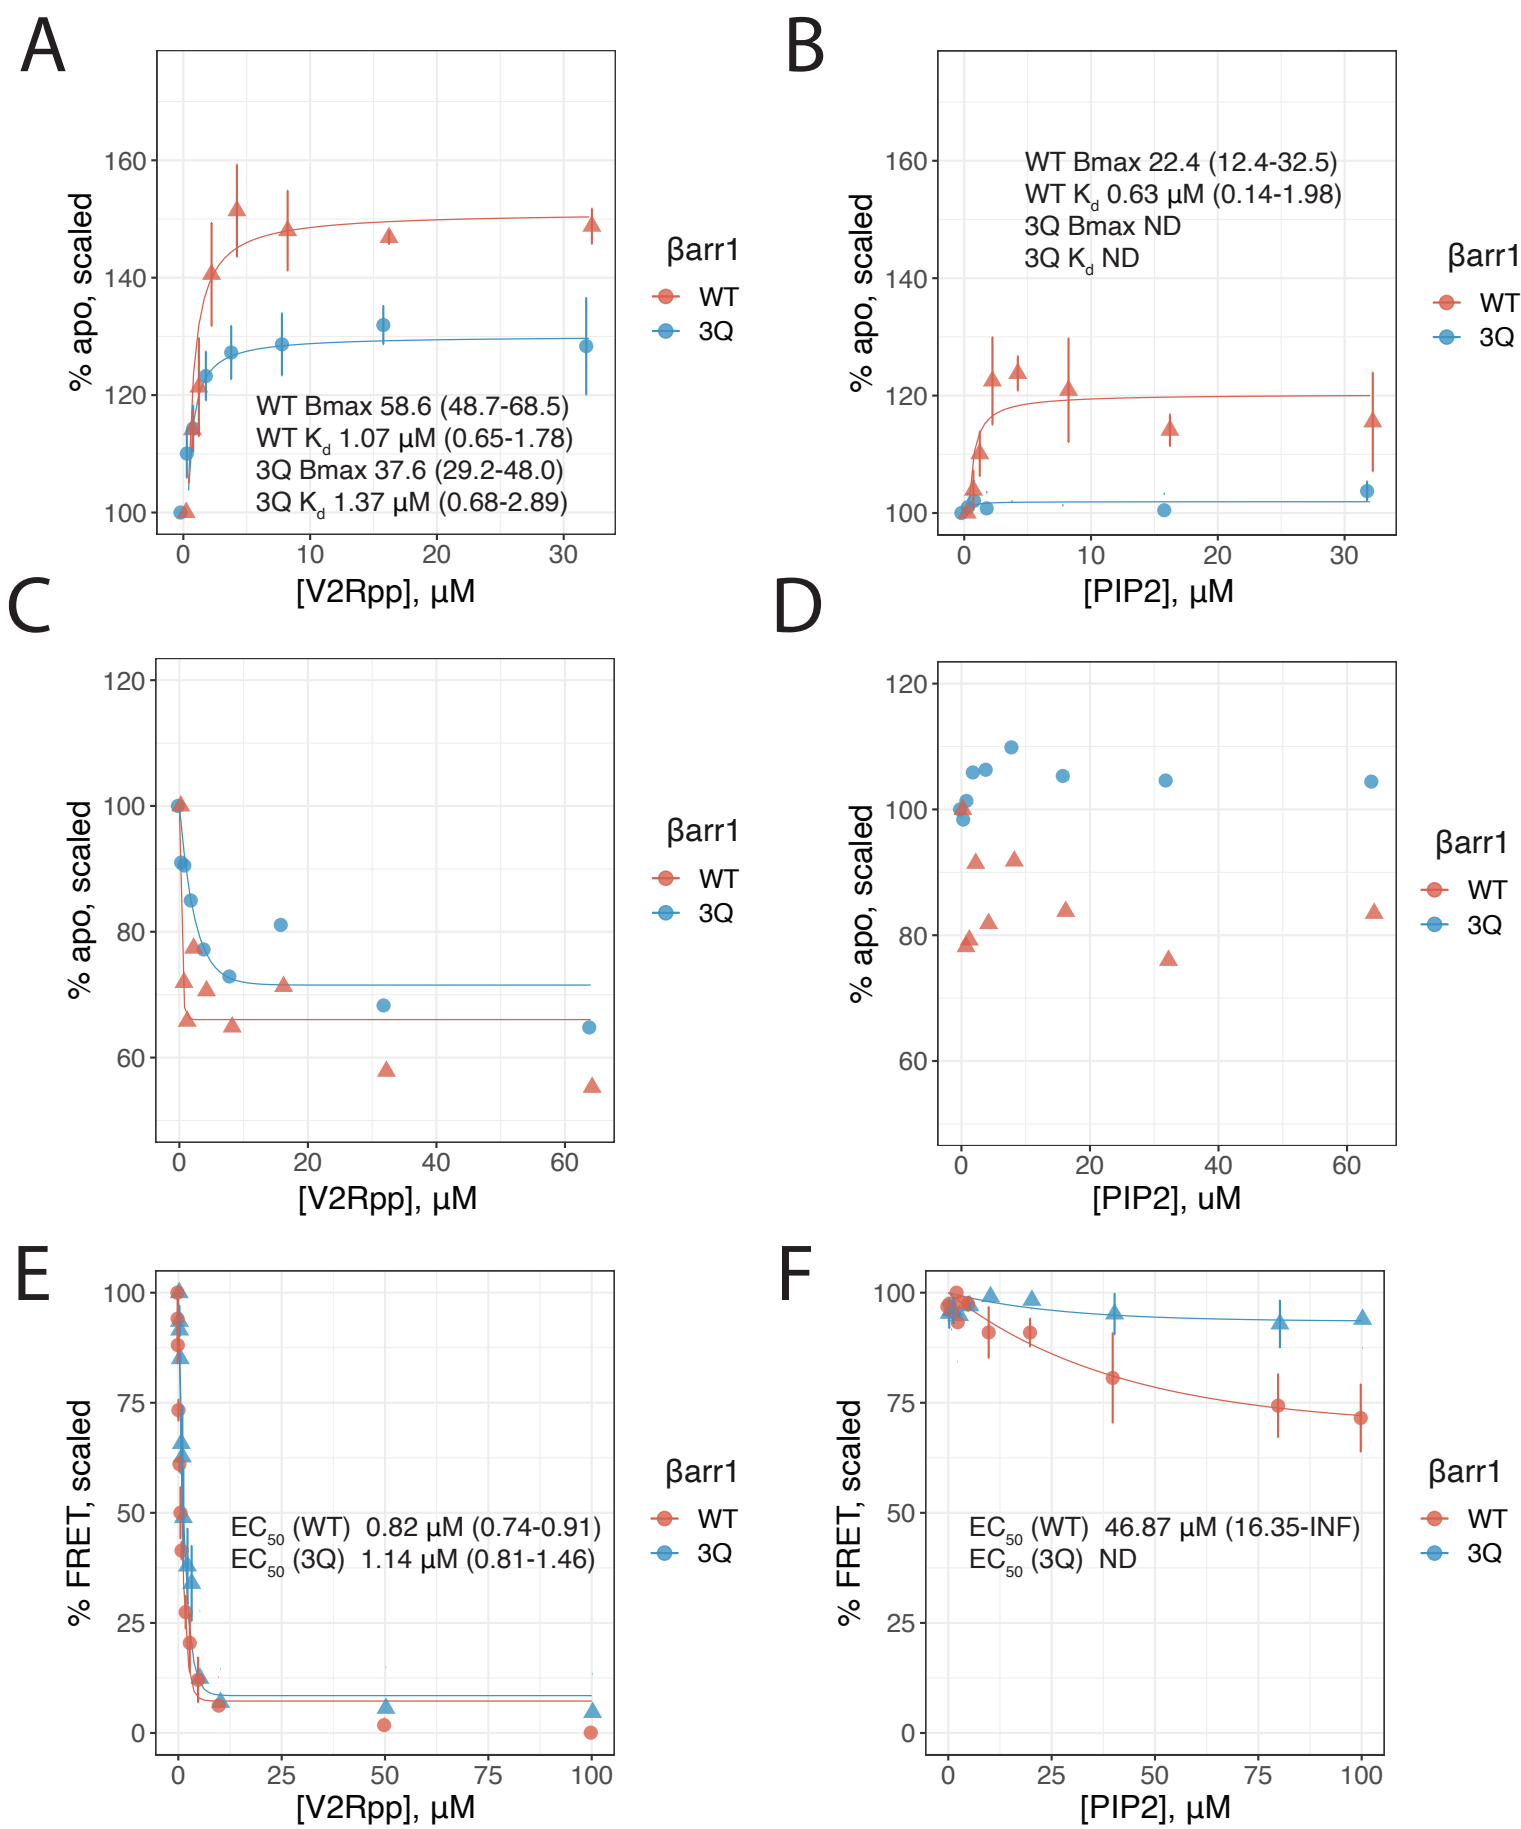

Source: https://www.biorxiv.org/content/10.1101/2021.10.09.463790v1.full.pdf
